# Supplementary material for: A Hotspot Phosphorylation Site on SHP2 Drives Oncoprotein Activation and Drug Resistance
Source: bioRxiv preprint, doi:10.1101/2025.06.11.659120, version 1 (2025-06-16)
Supplement: Supplementary Data 2 [file 659120_file05.xlsx]

## Sheet: EGFR mutant
Site	Log2FoldChange_proteomics	-log10(pValue)_proteomics
SHP2 pY62	6.347	13.517
PRPF4B:S87s	5.5651	0.272446
STOX1:T370t	4.9822	3.94617
TPX2:S121s S125s	4.84475	1.23003
HEPACAM2:S433s	3.6603	1.66575
CDS1:S9s	3.4856	5.92253
CCP110:S251s	3.4653	0.556159
PLEKHA6:S448s	3.2812	1.67829
RTCA:T106t	3.2525	3.78075
SVIL:T1227t	3.16555	1.31573
CIT:S1474s	3.14205	1.92501
PIGR:S682s	3.1118	4.39867
MYO3B:S1162s	3.0326	0.532437
HDGFL2:S264s	3.03175	3.27828
IVL:S12s	2.9134	2.11276
ITGA6:S534s S535s	2.9102	1.56183
GTPBP1:T577t	2.9076	1.92142
RAP1GAP:S521s	2.9069	2.4817
ZSCAN31:S211s	2.9046	2.56839
LRRC70:S420s	2.8855	2.30004
NAALAD2:S507s	2.86875	4.42395
MTUS1:T488t	2.82275	1.76674
TMEM63C:S77s	2.816	3.10126
MYO1D:S493s	2.8154	2.77909
TSC1:S1102s T1110t	2.81245	1.59521
EFHC1:T15t	2.7888	1.14855
C6orf47:S41s S45s	2.74725	1.41406
DCTN2:T64t	2.7357	2.54465
ARHGEF5:Y1370y	2.6912	6.12034
CIT:S1385s	2.67385	3.24626
CRABP2:S13s	2.67245	1.86228
SYTL2:S199s	2.6472	3.6017
TCAF1:S626s T630t	2.6421	0.60993
ADGRF1:S867s	2.6213	1.45673
HLA-A:S356s S359s	2.60485	1.15642
SRCIN1:S165s	2.5961	4.0081
MAGEB3:S70s	2.5875	3.2058
COBL:S988s	2.5867	3.33982
EXPH5:S688s	2.5833	3.16656
SPATA21:S113s	2.5766	1.9646
NECTIN4:S444s	2.5665	4.01215
DYRK1A:T466t	2.56495	2.80439
ANKRD18A:M1m S6s	2.5629	3.38995
SETD2:S918s	2.50955	0.896824
TCEAL4:S251s	2.4914	1.70501
BAIAP2:S511s	2.48905	2.69611
ZNF185:S64s	2.47795	4.31771
AUTS2:S872s	2.4769	1.03357
MAP2:S686s	2.4432	2.34553
RAP1GAP:S525s	2.42625	2.72561
GGNBP2:T137t Y140y	2.4191	4.45796
SLC41A3:S13s S27s	2.41395	1.56997
SLC35E1:S398s	2.40875	3.12273
CYP4X1:S268s	2.4066	1.8037
ERCC6:T1220t	2.4034	2.09826
WBP11:S361s	2.40175	0.747038
ERICH3:S212s	2.3975	0.421911
ARHGEF10L:S270s	2.3768	3.43791
PIGR:S708s	2.37635	3.90568
PMS1:S315s	2.34515	3.66513
PPP1R1B:S148s	2.3393	0.771366
VPS13B:T3559t S3562s	2.33355	2.2597
CRLF1:S127s Y130y	2.3309	4.38848
LYSMD3:S134s	2.3179	1.94831
ABCC3:T887t	2.3157	1.14409
ARHGAP45:S1127s	2.3108	1.61103
MAP7D2:S356s	2.2879	1.58548
C1orf116:S513s	2.2863	1.77142
EGFR:S1064s	2.28405	5.11167
PLCH1:S1551s	2.28365	2.22163
ACVR1:T203t	2.2834	1.17655
MAP7D2:S345s	2.28295	1.89797
ITGB4:S1679s	2.2824	0.684882
PCSK1N:M1m S4s	2.2764	0.591775
ITPR3:S1832s	2.2682	3.86741
LMO7:T1114t	2.2619	4.07748
HNF1B:S49s S52s	2.2582	1.37998
HIVEP2:S2425s	2.2472	0.612974
KAT6A:S1113s	2.2389	1.68309
LRBA:S1052s	2.23085	2.72543
IRX2:S186s	2.2271	3.55308
EGFR pY1092	2.2238	1.52373
SRCIN1:S64s	2.22325	4.94931
SRPRA:S142s	2.2206	1.34835
SEPT9:S6s	2.2165	1.57869
PPP1R14C:S25s	2.21635	1.67792
KMT2B:S894s	2.2136	2.19374
PIGR:S734s M741m	2.19245	3.23779
FBXL14:S173s	2.19015	2.30139
PPFIBP2:S387s S389s	2.18385	3.11787
SRCIN1:S517s	2.18015	4.92197
KRT19:S72s	2.1776	0.190915
C1orf226:S241s	2.17275	5.62227
ITPR3:S1843s	2.16715	4.73599
TGS1:S141s	2.1653	1.72172
PCLO:S826s	2.1645	5.79259
MUL1:S297s	2.16065	2.88229
LAD1:S121s	2.15805	2.73032
FAM84B:S12s	2.1553	2.2166
PPIP5K1:S1073s	2.15285	2.081
ITPR3:S934s	2.1449	3.95254
VPS35:S121s	2.1407	1.98261
CECR2:S1292s	2.1333	0.863918
SGSM3:S406s T409t	2.13305	1.58535
RAI14:S335s	2.1303	2.49152
CHAT:S473s	2.12345	1.09088
SPP1:Q21q S27s	2.1231	0.717274
EGFR pY1197	2.12115	4.92309
ANLN:S336s	2.1179	1.72863
SHROOM3:S927s	2.1149	3.68241
MED1:S1252s	2.1135	2.02677
FREM3:T118t	2.11335	2.37235
PLEKHA7:S1063s	2.1064	2.15123
C1orf226:S61s	2.1051	4.49373
ARFGEF3:S2097s T2098t	2.0984	1.88224
LRRN4:T719t	2.09245	1.68664
USP54:S525s	2.08505	3.6925
SLC4A4:S68s	2.08315	1.47609
TPX2:S125s	2.0729	0.908304
ESRP1:S237s	2.06575	2.99411
MUC21:S573s	2.0647	2.0336
SLC4A4:S255s S256s S257s	2.0588	1.30051
PRG3:S104s	2.05525	1.78302
PRAM1:S48s	2.0452	0.906394
AK9:S1002s	2.04345	2.06264
RAB11FIP4:S425s	2.0353	2.99046
EVPL:S906s	2.03505	1.06186
TLE3:S311s T312t	2.0316	2.57989
VAPB:T150t	2.0308	3.93911
CACNA1D:S869s	2.0226	0.645206
C2orf49:S90s	2.0221	0.957086
SRCIN1:S1060s	2.0192	2.27561
OCLN:S369s	2.01685	3.26101
RASGRF1:S758s	2.01355	0.927811
MLPH:S536s	2.01135	2.04068
ALPL:S394s	2.0094	0.475366
POR:S71s	2.0092	1.45668
C1orf116:S39s Y40y	2.0006	2.30814
EGFR pY1172	1.9975	6.63373
GJB1:S258s	1.9956	1.38941
ANKFN1:S91s S92s	1.99485	2.0453
SNX25:S639s	1.99455	3.00121
PPP1R9A:S1140s	1.9919	3.84476
MAP4:S921s	1.9858	1.06018
NAV2:S860s	1.9818	2.08066
GPAT2:S509s	1.98155	1.5344
EPN3:T495t S506s	1.9802	3.23764
FAM83E:S315s	1.9796	0.323761
ARID1A:S1338s	1.9784	0.694815
FHOD1:S406s	1.9776	2.5059
ERN1:S549s	1.9731	1.66152
PTPN13:S240s	1.9685	3.41037
CRYBG1:S19s T20t S22s	1.9685	1.6051
UBAP2:T260t	1.96835	0.692154
LMO7:S300s	1.96525	1.4633
ICOSLG:T20t	1.9622	1.70501
RRAD:S273s	1.9566	3.08994
ARHGEF19:S197s	1.9506	4.25543
TMEM159:S21s	1.9502	4.52949
EPB41L3:S92s S93s S94s	1.9484	0.899272
SLC24A1:T726t	1.9423	1.79826
SPEN:S3433s	1.94185	2.37727
ZNF318:S1396s	1.94105	2.50581
ANKRD34B:S502s	1.9325	1.57937
JPT2:S69s	1.92675	4.46393
CABLES1:S242s	1.9217	1.91114
USP54:S24s	1.9152	2.45196
KANK1:S312s	1.912	1.50502
SHROOM3:S285s	1.9105	2.06145
CNKSR1:S392s	1.9091	2.64199
BRDT:S685s	1.90715	0.179459
FNIP2:S15s	1.9048	4.1108
DSP:S2598s	1.8976	1.8785
HECTD1:S1567s	1.89715	5.81346
PPP1R12B:T869t	1.89675	2.93956
STK36:S26s	1.89025	3.11026
AVL9:S582s	1.8891	1.7669
CDK18:S89s	1.88705	3.54199
PTPN13:S958s	1.88475	2.52701
LEMD2:S82s	1.88455	2.99041
MAP2:S1808s	1.88415	0.701548
ZNF217:S976s	1.883	1.8404
MFSD6L:S585s	1.87405	2.25782
FBLN1:S247s	1.8733	1.55375
ARHGEF28:S245s	1.87255	1.9323
ANK3:S1797s	1.8723	2.70671
HECW1:S527s	1.86955	0.34175
NRSN2:S178s	1.8668	4.34529
PHKA1:S758s	1.86655	5.13724
INTS12:T355t	1.8657	0.70888
MAST3:S747s	1.86535	1.04803
BCAP31:S283s	1.86495	2.62573
BRWD1:S2048s	1.86045	2.60319
ASXL1:S430s	1.8587	0.362434
PIGR:S682s S684s	1.85845	2.96116
SRCIN1:S434s	1.8581	4.15413
FST:S230s	1.8551	2.04835
COBL:S574s	1.855	5.76578
MBOAT2:T474t	1.8546	4.5959
VPS13D:S756s	1.85215	1.22702
EXPH5:S876s	1.8515	1.48097
ELFN2:S636s	1.8431	2.52969
IRX2:S252s	1.842	1.91212
PPFIBP2:S416s	1.8398	1.98988
MAST4:S206s S213s	1.8396	3.99146
TRIM42:S537s M539m	1.8395	1.15293
ENSA:S125s	1.8328	4.03011
CISD2:T106t	1.8319	2.33318
ATP10B:S617s	1.8295	1.53914
DENND1B:S514s	1.82875	4.00368
ARFGEF3:S1635s	1.82145	4.7729
SLC34A2:S683s	1.8187	4.20781
LAD1:S480s	1.8161	0.559615
TRAFD1:S479s S480s	1.81405	1.69369
USP47:S868s	1.8099	0.817948
CRYBG1:S75s	1.80945	1.58776
PI4K2B:S78s	1.8093	1.13439
TAP1:S439s	1.8092	1.48486
MAP3K1:S1026s	1.80565	1.78484
MAPT:T69t	1.80515	1.31811
CTTN:S282s	1.8041	3.25506
C5orf24:S144s	1.7947	1.95355
PGRMC1:S181s S190s	1.7946	2.95259
LPIN3:S464s	1.7912	4.69444
SRCIN1:S513s S522s	1.7911	2.92121
DTNA:S563s	1.78875	3.24667
RBBP8NL:T638t S645s	1.7887	1.24078
FAM133B:S82s	1.7862	1.67536
AFF4:S703s S706s	1.786	4.1696
OCLN:S370s	1.78445	1.95142
PPP2R3A:S505s	1.7813	4.8059
TPD52L1:S154s	1.7782	1.35232
VPS50:S595s	1.7779	2.37035
IFNGR1:S315s	1.77775	2.64652
PRRC2B:S1185s	1.7741	1.1504
PTPN13:S1226s	1.7731	2.21184
SH2D4A:S275s	1.7684	2.25496
IRX1:S267s	1.76815	1.87602
MAGI3:S1407s	1.7653	4.6558
SEPT9:S22s	1.7638	2.10173
ARHGEF5:S57s	1.7601	4.44569
ZZEF1:T2224t T2226t	1.75855	1.4402
CHTF18:S64s	1.7564	0.750617
MISP3:S174s	1.7554	2.46015
FSIP2:S1538s S1539s S1542s	1.7524	2.70814
AGFG2:T163t	1.74725	2.21603
ANK3:S22s	1.7413	3.13384
KRT8:M60m T64t	1.74045	2.69797
MLPH:S233s	1.73755	1.42271
TACC2:S1110s	1.7366	0.176529
DAPK1:S319s	1.73085	2.67292
LAD1:S385s	1.7305	2.66859
KIF13A:S1529s	1.72815	3.77349
SRCIN1:S987s	1.72585	6.11679
JPH1:S216s	1.72575	3.59024
GRAMD2B:S84s	1.7252	0.966881
MACO1:S244s	1.7246	1.72051
ARHGEF26:T370t	1.7244	2.62339
EIF4G1:S1084s S1099s	1.7234	1.97254
C1orf116:S21s	1.7233	1.47568
PIGR:S673s	1.71935	1.62114
ARFGEF3:S597s	1.71925	4.07359
NEK11:S429s	1.71865	2.07677
NISCH:S1200s	1.7178	4.08071
OXNAD1:M1m S9s	1.71535	1.91036
PTPN12:S449s	1.7117	2.12234
CIC:S2253s	1.7099	0.689236
C1orf116:S526s	1.7059	0.695597
PTPN13:S1340s	1.7055	3.11433
SRCIN1:S45s	1.7048	5.25353
CAST:S67s	1.70385	4.37507
SETD2:S544s	1.70115	0.657606
PITPNM3:T299t	1.7006	4.13611
SORBS1:T27t	1.69945	1.43327
PLEKHA6:S591s	1.69755	3.20206
HNF1B:S49s N67n	1.6959	2.09364
NHSL2:S908s	1.69415	1.57087
KIAA1217:S1739s	1.69285	0.906153
CGN:S294s	1.6925	3.72932
TCF20:S825s	1.69095	2.46936
C1orf116:S133s	1.68635	2.22543
SPINT2:S238s	1.6858	1.84201
STK3:S434s	1.6852	2.04596
ARHGEF2:S125s	1.6844	4.32686
SOWAHB:S761s	1.6841	2.14587
SALL2:S222s	1.6835	3.40132
FAM160A1:S16s	1.679	2.06754
ACOXL:M1m T5t	1.67685	0.962214
TRIM2:S443s	1.6753	0.87018
MTUS1:S760s S761s	1.6752	0.801762
PRDX2:S112s	1.67505	2.97596
KLRG2:S204s	1.67485	3.10729
PTPN13:T1583t	1.6707	1.34207
NAV2:S619s	1.6687	0.110486
SLC35F5:S208s	1.6669	3.39097
ANK3:S1451s	1.66605	3.7626
PCLO:S906s	1.66205	4.48117
SPAG9:S524s	1.6618	0.766634
FHDC1:S498s S500s	1.66095	2.75367
KRT15:S148s	1.65955	0.525342
ACSL5:S28s	1.65755	4.24785
AFDN:S1460s	1.65755	2.90092
PIGR:S275s	1.655	2.10173
HOXD1:S193s	1.65425	2.60494
CCSER1:S336s	1.6529	1.04581
C1orf116:S496s	1.65215	2.25991
CLDN3:S199s	1.6521	2.01018
GJB1:S266s	1.64945	0.764439
KTN1:Y233y	1.64865	0.922363
SLC34A2:T58t	1.64855	1.27527
SCAMP3:S32s	1.6477	5.13855
DENND1B:S590s S596s	1.6413	0.439962
RAI14:T13t	1.6384	1.82493
CHAF1B:S458s	1.6351	1.78022
PITPNM3:S297s T299t	1.63505	3.56417
BICDL2:S349s	1.63355	3.11787
NFIX:S399s	1.6333	2.9217
PLEKHA7:S118s S121s	1.6317	2.09211
ARHGEF2:S126s	1.6299	2.46079
CYP2B6:S128s	1.6299	1.05553
ERBIN:S1015s	1.6295	1.42085
ABLIM2:S363s	1.6294	1.33956
GIGYF2:S650s	1.6288	2.59772
PDXDC1:T673t	1.628	3.65438
SRCIN1:S508s	1.62715	2.90936
SHROOM3:S406s	1.62565	1.22905
CECR2:S402s	1.6235	1.17874
PLCH1:T568t	1.62255	1.61152
PAM:S936s	1.62235	2.76602
PRR15L:S73s	1.62045	2.6116
LAD1:S364s	1.6203	1.3026
KRT20:S13s	1.6197	2.8282
C9orf135:T34t	1.6136	0.680851
SLC4A4:S223s	1.61215	1.27372
DTL:S557s	1.6105	1.61537
MAP1B:S582s	1.6066	2.36479
PPP2R3A:S614s	1.6066	1.04011
MLPH:S435s	1.60655	0.704383
PPP1R9A:S187s S190s	1.60625	3.34774
LMO7:S417s	1.60385	1.61571
VPS51:T61t N64n	1.59965	2.55147
ARFGEF3:S2081s	1.5965	4.80607
MAP2:S1679s	1.5958	2.17986
MAP1B:T1503t	1.58995	1.14883
DENND1B:S596s	1.5899	2.91401
FGD6:S410s	1.589	1.37804
PRRC2C:S289s	1.5885	1.26798
TMEM109:S239s	1.58705	1.26837
FAM13A:S329s	1.5847	2.05828
OFD1:S735s	1.5815	3.27658
EPS15L1:S593s	1.5812	2.76225
FAM13A:S401s	1.5808	2.75813
ADCY9:S691s	1.5788	3.64492
LPIN3:S412s	1.5755	4.64141
KIAA1211L:S57s	1.57545	1.1077
CDK18:S14s	1.57475	3.15758
CANX:Q606q S608s T616t	1.57355	1.09099
MUC1:Y458y	1.57345	2.00572
ZNF608:S782s	1.5732	4.67232
RBBP8NL:S262s	1.571	4.54166
CAST:S216s	1.568	3.42205
BCAR1:S474s	1.5669	2.05002
RANBP2:T2005t S2008s	1.56675	3.50122
KIF1B:S1599s	1.5656	2.76299
PLEKHA4:T622t S624s	1.5648	1.42422
PPL:S341s	1.5636	0.856923
NAT1:S77s	1.563	5.43881
DCDC2:S300s	1.56285	0.69301
ZFP36L1:S161s	1.5611	1.36687
CDKN2AIP:S349s T359t	1.56105	3.75143
EIF5B:S460s	1.55995	1.06648
MKI67:S108s	1.5569	0.718235
SLAIN2:S413s	1.55655	6.17209
CAMSAP3:S1042s	1.55595	3.4911
WNK3:S62s	1.5554	0.386976
FGD6:S417s	1.55475	0.579511
MRTFB:S205s	1.5541	3.86996
KIDINS220:S1360s S1362s	1.5541	1.03913
TRIM2:S428s	1.55395	3.98951
SMG1:S34s	1.5539	3.91719
MBOAT2:T501t	1.552	2.21673
NHSL1:S1417s	1.5494	2.36131
EPPK1:T1543t	1.5488	0.861258
GIGYF2:S684s	1.547	1.20647
ARHGAP12:S176s	1.54605	2.80003
TNKS1BP1:S429s S435s	1.546	2.19129
ARHGAP36:T174t	1.5444	1.71851
MICALL1:S740s	1.5438	2.87289
CLINT1:S459s	1.5432	4.06431
LARP4:S624s	1.54205	3.12208
TMEM63B:S111s	1.5418	1.14373
SGSM3:S406s	1.5411	2.65221
BCL11A:S625s	1.5395	1.45604
MACF1:S2942s	1.5393	3.65453
FIG4:S630s	1.5389	3.79184
FHOD1:S1170s	1.538	1.27447
ZNF471:T419t	1.5378	2.52605
KRT80:S51s	1.5369	1.6401
NCOA2:S579s	1.5366	1.41795
PARG:S68s	1.5365	2.00921
POLR3C:S46s	1.53495	1.77674
KMT2A:S2741s	1.534	1.24966
PLCH2:S1290s	1.53255	0.627966
STIM1:S512s	1.53095	3.19756
HLA-A:S356s	1.5305	0.508611
RTN1:T300t	1.5287	3.3881
DHCR7:S14s	1.5267	1.58041
KAT7:T88t	1.52595	1.09472
RAP1GAP:S441s	1.52585	1.9352
CARMIL1:S1068s	1.52545	1.37512
PHKA2:S729s S735s	1.5253	1.53093
CUX1:S663s	1.5246	3.75282
ARL6IP4:S225s	1.52075	2.96481
KIF14:S1116s S1124s	1.5206	2.67321
RIF1:S533s	1.51815	1.4203
COBL:S235s	1.5172	3.91345
ARHGEF28:S311s	1.51705	1.05781
KIAA0408:S383s	1.51665	0.922682
JPH1:S216s S220s	1.51505	2.37435
PYM1:T68t	1.51465	1.46351
PEX3:S221s	1.513	1.54404
CWC15:S32s	1.51195	1.57832
QARS:S70s S74s S78s	1.511	2.8517
BRWD3:S1579s	1.50985	2.85963
SHROOM3:S1069s	1.5073	3.05404
NPM1:S139s	1.5064	0.0498468
APPL2:T405t	1.5062	1.70679
CNST:T294t	1.50455	3.0441
MAP2:S217s	1.50245	0.729163
IQSEC2:S902s	1.5014	1.1315
WWC3:S907s	1.50015	3.26299
EPHX3:S61s	1.4983	0.413398
LGALS8-AS1:T85t	1.4982	0.962428
ARHGEF19:S338s	1.4977	3.90623
IL16:S45s	1.4965	1.31972
KRI1:S169s	1.4952	1.80405
ADCY9:S632s	1.4948	1.97358
PTPN13:S1542s	1.4929	1.32069
SRCIN1:S866s	1.4919	4.06287
FAM13A:S562s	1.4903	2.63913
RANBP2:S1955s	1.4891	3.91467
SZT2:S2902s	1.48905	3.83601
PPP1R12B:S420s	1.4835	2.99465
SNX19:S737s	1.483	2.30158
SEPT9:S111s	1.48285	1.15154
EPHB4:Y614y	1.4823	0.783603
PDXDC1:T662t	1.4819	1.86644
LMTK2:S878s	1.4817	3.5857
NKX2-1:S34s	1.4807	0.698741
GRHL2:S81s	1.4795	1.72108
MAP7:S290s	1.4792	1.87586
CAST:S462s	1.4767	1.62761
SHROOM1:S250s	1.4767	1.21124
UIMC1:S402s	1.4765	1.11817
GRSF1:S335s	1.4763	0.68112
C1orf226:S91s	1.4759	1.90034
ZNF704:S77s	1.4752	2.6641
C1orf116:S532s	1.4748	2.76269
EEF2K:S18s	1.47455	3.10798
SYT17:S119s	1.4742	1.20218
BET1:S48s	1.47355	1.58815
CAMSAP3:S376s	1.4729	0.611413
PLCH1:S565s	1.472	0.845593
AFF1:S627s	1.46715	3.83542
PBX3:T191t M202m	1.46695	3.05625
SLTM:S730s	1.4669	1.58367
CUL4A:S10s	1.46555	2.60686
COBL:S962s	1.4652	3.96026
DDX52:S22s	1.4651	2.84119
MOSPD2:S299s	1.4646	4.68491
CWC15:T47t	1.46445	2.39293
RALGAPA1:S932s	1.4639	3.83387
SLC39A11:S125s	1.46305	2.78605
SPATS2L:S189s	1.46215	2.65221
HNRNPUL1:M12m T16t	1.4615	2.75714
GRK3:S423s S434s	1.4615	1.23345
CA9:T457t	1.46145	0.276553
KIAA1522:M1082m S1087s	1.4614	3.56221
ZCRB1:S155s	1.46095	2.26824
HMGN5:T31t	1.4604	0.978624
C1orf116:S36s	1.45965	3.18322
SSH2:S690s	1.45615	4.45908
TRIP11:S1859s	1.4519	2.72964
CLDN6:S201s	1.45005	1.62921
DBNL:T299t	1.44985	1.1384
MTUS1:S740s	1.4477	1.55635
IRF6:S131s	1.4441	3.31978
ARFGEF1:S1079s	1.44305	3.75169
RTN3:S16s S17s	1.4427	2.10382
AJUBA:S79s	1.4421	3.32926
EGFR:S1166s	1.44185	3.38065
SRGAP2:S1013s	1.4416	3.16467
MET:S984s	1.44125	0.488298
AKAP6:S1335s	1.4405	1.75078
CCDC88C:S1591s	1.4398	3.05183
SLC35D2:S116s	1.4379	1.14982
POM121C:S159s	1.43775	1.51693
TACC2:S2618s	1.43675	0.127435
RBL2:S1080s	1.4365	3.12777
ARHGAP12:S617s	1.4363	1.33511
EGLN1:C36c S39s	1.4362	1.08721
RPS6KA3:T231t	1.4357	1.57947
SYTL2:S489s S494s	1.43535	1.56601
NECTIN4:S426s	1.43455	3.41948
SPP1:S263s S270s	1.4342	0.527427
ITPR3:S937s	1.4333	3.80873
AFDN:T1458t	1.4331	2.63667
MAST4:S23s	1.4328	3.11093
KIAA1522:S891s	1.431	3.13486
ATP7A:S1463s S1466s	1.4307	2.09281
ARFGEF3:S1948s	1.4296	4.70808
ARFGAP3:S429s	1.429	1.02747
EMD:S143s	1.429	1.83408
FAM135A:S557s	1.4286	0.679244
CFDP1:S221s	1.42795	2.37412
GPATCH1:S705s	1.4256	1.1389
REM2:S27s	1.42545	0.175973
ESPN:S342s	1.424	0.723546
SPAG9:S1288s	1.42075	3.00023
KLHDC7A:S365s	1.4178	3.86136
ARHGAP35:S1001s	1.41775	4.09421
HUWE1:S3802s	1.41725	3.88502
PLEKHA6:S459s	1.41655	2.55297
VAPB:S146s	1.41595	3.46469
VPS52:S337s	1.41395	0.1589
PPP1R14C:S43s	1.4135	2.03211
AIFM1:S266s	1.4114	1.73392
FGFR1OP:S228s	1.41065	2.87437
ELOA:S251s	1.40935	2.74227
HLA-A:S352s S356s S359s	1.40835	1.33765
ICK:Y159y	1.40785	1.8898
CMTM4:T192t	1.40775	1.9352
UBAP2L:S859s	1.4059	3.65438
CGN:S338s	1.40575	2.56191
CARMIL1:S1067s	1.4046	1.02736
PHTF1:S254s	1.4041	1.12046
PITPNM3:S321s	1.40405	4.73597
ADCY9:S688s S691s	1.4039	2.88232
ENAH:S531s	1.40385	1.92846
KMT2D:S1151s T1164t	1.40365	3.06456
HLA-A:S352s	1.40205	0.910866
ADD3:S621s N630n	1.40185	0.956489
RREB1:S1238s	1.4015	2.60015
TBC1D14:Q248q S249s	1.40105	1.54656
FKBP8:S297s	1.40015	2.89449
CEP170B:S783s S798s	1.3997	1.27512
PITPNM3:S907s	1.3996	3.99511
MAST4:S156s	1.39955	1.63214
AIFM1:S268s	1.3992	0.483295
LPCAT1:S19s	1.39695	1.90077
C1orf116:S519s	1.3968	3.05877
KIAA1522:S197s	1.39565	2.3727
PLEKHA7:S604s S612s	1.3952	3.77984
PKMYT1:T455t	1.39505	0.729917
MAST4:S137s	1.395	2.55056
PCM1:S1970s	1.3946	0.471664
ATG2A:S1402s	1.39445	2.65824
MYO9B:S1430s	1.39415	1.41249
JPH1:S162s	1.3926	3.11144
TANC2:S1968s	1.39235	1.86409
EPS8L2:S240s	1.39195	1.32082
SHROOM1:S308s	1.39175	4.82231
SFT2D2:S9s	1.39165	2.80003
C1orf226:S265s S266s N273n	1.39105	3.3283
ANKRD28:S1044s	1.3895	1.23609
RAPGEF5:S375s	1.3877	5.08616
KIAA1671:S1775s	1.38615	1.06391
SIGIRR:S383s	1.3853	2.04991
OSBPL6:S290s	1.38515	3.42146
MAP1B:T1853t	1.3838	1.31913
GIGYF1:S137s	1.3837	1.05029
ARHGAP35:S1150s	1.3833	2.22493
MAP7:T253t	1.3832	0.976636
CEP170B:T537t	1.3829	3.17968
LAD1:S485s	1.3826	2.13644
SRCIN1:S339s S343s	1.3818	3.72775
ARHGEF3:T50t	1.38145	1.66985
ARFGAP2:S433s	1.38095	0.982216
KCTD5:S29s	1.3809	2.5934
SLAIN2:S433s	1.3806	3.07438
PMS1:T8t	1.3799	2.18717
TRIM2:T93t	1.3797	1.55864
MPRIP:S504s	1.3792	0.284295
TNIK:S795s	1.3785	1.80775
EIF4G1:T496t	1.3779	1.25081
PHACTR4:S565s	1.37745	5.47473
JPH1:S475s	1.37495	1.96132
SLAIN2:S431s	1.3745	4.48179
SHROOM3:S1173s	1.3744	1.41508
AKAP1:S592s	1.37415	3.01044
RTKN:S218s	1.37405	0.363986
ELOA:S163s	1.3713	2.32604
TTN:S17332s	1.37115	0.784729
ARHGEF5:S1011s	1.3704	5.15301
DENND5A:S441s	1.36955	2.38478
ARHGEF40:S1504s	1.3684	2.40158
PPFIBP2:S395s	1.3675	2.93833
SRCIN1:S409s	1.3674	0.736875
USP24:M1284m S1285s	1.3668	2.59784
APRT:S30s	1.3659	0.887038
KIF26B:S553s	1.36575	2.48108
PCP4L1:S9s	1.3657	1.34561
NASP:T464t	1.36425	2.17316
PTPN13:S2013s	1.363	2.69797
FARP2:S457s	1.3628	2.23739
MAGIX:S14s	1.3614	2.57592
PPP1R12B:S504s	1.3614	1.0485
PRR15L:S102s	1.361	2.96271
EPRS:S944s	1.36075	2.53748
LARS:M1m S12s	1.35925	4.39855
GLCCI1:S145s S148s	1.35875	0.756597
RIMS3:S24s	1.35835	2.76773
IQSEC2:S230s	1.358	2.4841
ANK3:S935s	1.35635	1.50179
CTTN:T323t	1.35585	2.33761
RAP1GAP:S516s	1.3544	1.94325
RAP1GAP:S439s	1.353	2.25197
ERBB3:S982s	1.35195	2.90403
ANKHD1-EIF4EBP3:S803s	1.3517	3.82352
PALM3:S548s S550s M555m	1.3516	0.718247
PTPRU:S863s T867t	1.35145	1.95008
LARP4B:S424s	1.3509	1.2357
RASGRF2:S509s	1.3502	4.68962
ZC3H11A:T579t	1.3497	1.13977
TSC2:S1352s	1.34955	3.43207
GRHL1:S25s	1.3493	0.584573
PALM3:S550s	1.3483	1.26769
SLAIN2:S391s	1.34805	2.68664
LRBA:S1767s	1.34765	1.85907
SYT17:S110s	1.3474	2.33834
SNX29:S268s	1.34715	1.69237
PKDREJ:S135s	1.34525	3.66496
TNIK:S541s	1.34045	0.903943
HNRNPM:S528s	1.3401	0.823834
MCTP2:S347s	1.3397	0.0317438
MACC1:S191s	1.339	2.60757
SALL2:S797s S802s S806s	1.3389	1.17812
PTPN13:S301s	1.3385	1.34694
EML4:T96t	1.33775	2.66133
MYO18A:S132s	1.33715	2.62122
KIAA0513:S218s	1.33715	0.623548
PDE3B:S1059s	1.3367	2.3114
MEI1:S865s T868t	1.3365	1.84719
AP3D1:S9s	1.33575	0.172745
GOLGB1:S2221s	1.3353	1.76128
C1orf116:T507t	1.3349	3.03218
MYRIP:S638s	1.3342	1.58845
KIAA1217:S1668s	1.33345	1.54125
GRHL2:T500t	1.33325	1.53974
C1orf116:S487s	1.33205	4.00744
TRIP11:S1001s	1.3311	2.29454
RIF1:S1238s	1.33085	3.66553
CLDN3:S199s S203s	1.32955	2.5227
FMN1:S447s	1.32805	1.96159
FAM83H:S785s	1.32785	3.13769
HLA-A:T345t	1.3263	1.6947
SLC20A1:S277s	1.32595	3.54965
ERBB3:S717s	1.3255	3.57168
CAMK1D:S330s	1.3251	1.5451
CLU:S133s	1.32465	1.29618
RHBDF1:S8s	1.32335	2.62744
CDK18:S98s	1.32285	1.98994
SSH2:S784s	1.32145	5.23443
RBMS2:S106s	1.3209	2.02029
HTATSF1:S445s S452s S453s	1.3209	0.372749
FAM241B:S28s	1.3207	3.36042
CEP170B:S549s	1.32015	2.89716
TM7SF2:S319s	1.3198	1.51411
CIC:S456s	1.3187	1.42224
GRIP1:S901s	1.3177	0.633832
ACIN1:S825s	1.31715	3.06858
TMEM173:T356t	1.31675	1.84315
GAB2:Y643y	1.3161	1.03373
COBL:S668s	1.3156	1.24477
PTPN13:S1779s	1.313	0.849653
MAP1B:S541s S544s	1.31115	1.51762
EXPH5:S981s	1.311	1.69136
FKBP3:T103t	1.31075	2.81015
PALM3:S375s	1.31075	1.26112
UBAP2:S254s	1.31055	0.703266
SNX25:S665s S668s	1.3105	4.09957
ARHGAP27:S119s	1.3098	2.04581
AFF4:S212s S222s	1.3095	2.83216
CHTOP:T33t	1.3078	1.44397
CCDC146:T268t	1.3069	1.08752
NCOR2:S1326s	1.3052	3.10382
PI4KB:S496s	1.30515	2.43816
NCOR2:S1262s	1.3051	2.98559
MELK:S338s	1.3051	1.40559
SLAIN1:S425s	1.3041	1.97804
CWC25:S170s	1.3035	0.747615
OXR1:S91s	1.30345	0.893245
SEC14L1:S7s	1.3028	0.118338
ANKHD1-EIF4EBP3:S1679s	1.30265	0.992776
DNM1L:S542s	1.30245	2.96425
MAPRE2:S197s S211s	1.30245	0.929168
ZNF638:S1462s	1.3019	1.05971
NBEAL1:S742s	1.30165	1.51099
PTPN3:S335s	1.30015	0.945664
SPATS2L:S165s	1.29945	1.20622
LAD1:S394s	1.29925	1.34413
RBL2:T401t	1.2988	3.55379
USP54:S1101s	1.2977	0.444365
PTPN13:T1982t	1.2964	2.79078
ITPR3:S916s	1.29625	5.07343
KCNK5:S266s	1.29535	2.57909
MAP1B:S1852s	1.29505	1.10275
FAM122B:S207s	1.2944	2.48446
NRIP3:S40s	1.29435	0.940487
TRIM13:S174s	1.2939	2.88694
SPATS2L:S548s	1.29325	2.88947
MYO18A:S102s	1.29295	3.92498
AHNAK:S1876s	1.2929	0.381705
NUP153:S926s	1.2903	2.38458
GTF2I:S722s	1.28825	2.64311
GCC1:S450s	1.287	2.71638
AFDN:S471s	1.28675	3.49512
PLEKHG1:S677s	1.28675	1.53249
HPRT1:S110s	1.2858	3.6993
NEK9:T214t	1.28535	1.50991
ARX:S20s	1.2847	0.539428
SHROOM1:S166s	1.2833	2.14071
SQSTM1:S287s S288s S291s	1.2831	2.06366
ARFGEF3:S2097s	1.28205	3.0981
GOLGB1:S3001s	1.28095	2.9023
MISP3:S208s N210n	1.2804	2.59784
PRRC2A:S456s	1.27995	1.99783
MTUS1:S760s	1.2796	1.73858
TRIM2:S96s	1.27815	2.23941
FUBP3:T184t	1.2781	1.93232
EXPH5:S124s	1.2765	1.28898
PGRMC2:S128s	1.2763	0.740822
ANKRD50:S1352s	1.27595	2.66133
MICALCL:S399s	1.2757	2.32866
HECW1:S721s	1.2752	0.372248
TOP2A:T1397t T1403t	1.27445	1.65714
MLPH:S482s	1.2742	1.47007
IRX5:S464s	1.2723	1.84174
ITPRID2:S330s	1.27215	2.48918
KDM3B:S560s	1.27205	3.95817
LRCH4:S307s	1.2702	3.06563
RMDN3:S373s	1.2683	1.70249
ZNF704:S294s	1.2678	2.03084
PTPN13:S890s	1.2674	1.30147
PTPRK:S857s	1.26605	4.33979
WIPF2:S155s	1.2654	4.55368
WWC1:S834s	1.2644	1.48467
MAP2:S1727s	1.2643	1.81152
MARVELD2:S407s	1.26425	2.96276
SHC3:S324s	1.2627	1.86095
TJP3:S221s	1.2625	1.52359
C1orf116:S555s	1.2624	2.24488
ARHGEF28:S222s	1.2623	2.52744
ZNF391:S47s	1.26225	0.943589
ARHGEF16:S129s	1.2622	0.884556
HECW2:S1040s S1042s	1.2618	0.699884
PTPN13:T909t	1.2617	1.30543
RAPH1:S41s	1.2614	1.46694
NEO1:S1299s	1.25925	0.359017
EIF4G1:S1245s	1.2591	4.69922
ARHGEF11:S16s S17s	1.2586	1.53392
AKAP11:S29s	1.258	1.3039
CLGN:S581s	1.25795	0.690367
DNMBP:S338s	1.2579	3.00698
PDXDC1:S718s	1.2579	1.7979
DDX3X:S62s	1.2575	0.427562
HSPB1:Q80q S82s	1.2574	2.42944
PLEKHG3:S614s	1.2567	0.0134806
LRIF1:S502s	1.2543	2.08719
ZC3H14:S327s	1.25085	2.56075
SALL2:S806s	1.2496	3.83575
KIAA1522:S917s S921s	1.24955	2.41724
RTN1:S352s	1.24905	2.23327
NHS:S506s	1.2489	2.18369
PROSER2:S8s M13m S15s	1.24845	1.34104
RALGAPA1:S342s	1.2481	1.17357
ZNHIT2:S115s	1.24785	0.309106
GPRIN1:S452s	1.2476	1.53566
MAP1B:S1171s	1.2468	0.442115
TSPYL5:S227s	1.2461	0.374487
COBLL1:S204s	1.24475	3.50155
C11orf52:S62s	1.24365	1.7454
SVIL:S1402s	1.2434	2.70627
OCLN:S321s	1.2431	3.38065
SCAF1:T849t	1.2431	1.38258
ZNF362:T162t	1.24305	2.61925
CLEC16A:S863s	1.24265	1.14147
TTC3:S400s	1.242	2.99302
CCSER1:T132t	1.24195	1.95635
AHNAK2:S5497s	1.24185	0.100854
MAP7D1:S366s	1.2411	4.687
NUFIP2:S608s	1.24055	2.749
BCR:S698s	1.2404	1.89657
WDFY3:S2295s	1.2403	1.26265
SLC12A2:S242s N261n	1.2399	2.16588
SYTL2:S279s	1.2399	0.953171
FNIP2:S713s	1.2398	2.1142
PLEKHA7:S1022s	1.2396	1.34321
LAD1:S347s	1.23775	0.818294
WNK1:S2632s	1.2377	3.8797
TTI1:S1029s M1035m	1.2375	1.25713
MAP9:S97s	1.2372	1.02082
CD34:N362n N371n S374s	1.23665	0.696384
GPHN:S338s	1.2353	3.2679
GTF2I:S988s	1.23435	2.87426
PAG1:Y317y	1.2341	0.784344
ZFYVE26:S144s	1.234	1.33508
MADD:S813s	1.2339	1.17871
PTPN12:S412s	1.2331	1.78612
WDR60:S30s	1.23275	1.74298
WWC1:S141s	1.23245	3.30514
ANK3:S1840s	1.2322	2.15661
ALKBH5:S379s	1.2319	1.82635
ALYREF:S15s	1.2312	1.59375
CD2AP:S256s	1.231	1.1343
IRX2:S317s	1.23085	3.37034
VIM:Y61y	1.23035	2.45769
TANC2:S1724s	1.22905	2.08557
HIVEP2:S2270s	1.229	2.7724
PPFIBP2:S331s	1.22805	2.772
CELSR1:S2968s	1.2279	2.00921
EXD2:S37s	1.22765	2.29609
RRM2B:S329s	1.2265	1.21447
C1orf116:S560s	1.22445	4.13122
STAU1:T473t	1.2234	1.75733
ABCC3:T887t T890t	1.2224	0.266176
TSC2:S939s	1.2222	0.707664
BLNK:S141s	1.2217	1.35497
EEF2K:Y463y S464s	1.22115	1.40214
HMGA1:T78t	1.22105	0.0318487
SOGA1:S1410s	1.2207	1.38671
SAMD1:S261s	1.2204	1.69807
SIK2:S534s	1.22035	3.23779
TAGLN2:S184s	1.22005	4.10837
TMX1:S270s	1.2197	2.02951
TMC6:S113s	1.21965	1.08408
NASP:S344s	1.2196	2.39338
ZNF704:S225s S228s	1.2194	2.37165
MSH6:S261s	1.2188	1.45668
NCOR2:S1323s	1.21785	0.808064
DTNB:S394s	1.2171	2.63652
ZFAT:S623s	1.217	1.05203
DOP1B:S1021s	1.21675	2.09364
HNF1B:S80s Y86y	1.21665	1.61795
MUC1:S456s	1.21625	1.62281
PTPN13:S938s	1.21595	2.36885
HLCS:S226s	1.21515	2.208
PRR36:T1082t	1.21495	2.01379
ZNF318:S993s	1.21455	2.56571
AXL:T509t	1.2145	1.21298
SF1:S20s	1.21435	1.54206
RALGAPA1:S1241s	1.2126	1.53637
DTL:S485s S490s	1.2126	0.805387
SEMA4B:S846s	1.21145	0.0389161
HTATSF1:S721s	1.21115	1.86154
AXIN2:S70s	1.2097	1.80374
PCM1:S1761s	1.20905	2.39132
ARHGEF40:T270t	1.20895	1.22606
RALGAPA1:S711s	1.2088	1.00488
ARHGEF5:S652s	1.2087	0.953016
TNFRSF10C:S121s	1.2084	0.205678
MCM3:S717s T719t S726s	1.20785	0.435415
MTUS1:S808s	1.20735	0.710709
APBA1:M281m S282s S285s	1.2068	1.43036
EPB41L1:S546s T550t	1.2066	2.93273
ICA1:S316s	1.2062	1.26307
LNPEP:S91s	1.20545	3.05911
MLH3:S746s	1.2051	2.25865
STAP2:N266n S289s	1.2045	2.79068
MACF1:S2325s	1.2042	3.73833
RERE:S40s	1.2029	2.05653
C15orf38-AP3S2:S86s	1.20275	1.84249
TMEM161A:S44s	1.2025	2.01144
ANLN:S182s	1.20245	0.881083
PAM:S964s	1.20225	2.5683
GRB14:S285s	1.20195	0.927111
SYNE2:S6349s	1.2015	2.30903
KMT2C:S2068s	1.20105	2.23275
KIAA1522:S965s	1.1998	1.76112
ZMYM3:S433s	1.19785	0.467203
ARFGEF2:S1024s	1.1978	1.98816
ERICH3:S190s	1.1977	0.873473
MAST4:S166s	1.19765	2.00955
IFIT3:S374s	1.19735	2.11314
PTPN13:S1490s	1.19555	0.35598
SLC4A7:S288s S292s	1.1949	1.52267
RBL1:S988s	1.19475	0.908493
HP1BP3:M161m T166t	1.19445	4.03465
KIAA1522:S948s	1.19245	2.51304
MEF2D:T256t S258s	1.1922	2.02902
ANK3:S873s	1.191	2.50547
THEM6:S199s	1.19095	1.86164
RBBP8NL:S645s	1.19075	1.09369
NMI:S16s	1.1901	1.64886
HMGCR:S504s	1.18905	3.90516
GGA2:S327s	1.18895	2.91358
TUT4:S831s	1.1887	1.95797
NFIX:S301s	1.1886	3.23779
MIA3:S1908s	1.18835	1.92549
RAP1GAP:S7s	1.1878	1.25134
MBD1:S336s	1.1876	0.59312
BAG6:S1084s	1.18685	0.805631
AHNAK2:S1346s	1.1868	0.904817
KIF16B:S657s	1.18655	2.97596
EIF2S3B:T9t	1.1865	2.22227
C1orf116:S453s	1.18525	1.97146
PLEKHA7:T123t	1.185	1.83558
GRHL2:S448s	1.1845	1.55214
PLEKHG1:S879s	1.18405	3.7984
MIGA1:S147s	1.18375	3.92888
PHRF1:S101s	1.1825	2.54744
PARN:S557s	1.18245	1.99955
RBM26:T614t	1.18245	1.64123
PPP1R14C:S158s	1.1812	1.55672
MST1R:S1056s	1.18095	1.20133
C1orf116:S313s	1.18085	1.86537
RUSC1:S809s	1.1804	2.85768
TEX2:S295s	1.1801	1.22987
MLLT3:S301s	1.18	0.666596
CEP290:S1594s	1.17975	1.52261
KRT8:T468t	1.17905	0.877677
HTATSF1:S241s	1.17855	5.08104
ABCF1:S166s	1.17855	2.58461
GPRIN1:S704s	1.17835	1.70391
FMN1:S1181s	1.1781	2.07871
SPATA6L:S399s	1.1778	1.25242
CEP170B:S970s	1.1776	2.38737
HSPB1:S199s	1.17725	3.97267
EXPH5:S1238s	1.1759	0.505833
LYN:Y397y	1.1757	1.04535
IRX5:S377s	1.1754	1.57848
NIPBL:S1042s	1.1744	1.20428
DOCK10:S1226s T1236t	1.17415	1.64136
MAP1B:T2051t	1.1736	0.884564
LAD1:T19t	1.17335	0.760209
BSN:S2823s	1.1727	2.45816
ABCC3:S844s	1.1718	1.81304
GAPVD1:M457m T458t	1.17125	0.626093
SNX19:S728s	1.1712	1.00852
LEMD2:S499s	1.17085	2.88256
GRAMD2B:S87s	1.17055	3.17754
SHROOM3:S676s	1.17	1.80545
MAP2:S1534s	1.1696	0.562367
TTC3:S1049s	1.1677	2.22279
TOP1:Y125y	1.1675	0.913319
ANK3:S960s	1.1669	1.82603
ARFGAP1:S150s	1.16685	1.24745
DIS3L2:S194s	1.16675	1.39994
PHKA2:S729s	1.1667	2.4732
RNF114:S129s	1.16635	0.628177
EPB41L1:S510s	1.16465	2.57984
HIVEP3:S948s	1.1645	1.82305
CTTN:S113s	1.16435	1.78302
COBL:S1227s	1.16375	2.33731
PPP1R13L:S328s	1.1621	1.2583
TRIP4:T327t	1.161	2.07888
C2CD2:S511s	1.16065	2.10173
AKAP9:S1327s	1.1606	3.3549
KIAA1522:S563s	1.1599	1.87581
FRS2:S365s	1.15975	2.07748
EPHB4:Y614y	1.15895	2.99303
SRP9:S34s	1.15865	2.4066
PPP1R13L:S102s	1.15735	2.53513
SETD3:S12s	1.1569	3.16755
EPS8L2:T184t	1.1569	0.914262
TPD52L1:S86s	1.15665	3.99931
RAP1GAP:S548s	1.15635	0.750679
ABCC3:S908s	1.15615	3.08219
SYT17:S118s S119s	1.1561	0.867956
KIAA1211L:S690s	1.15585	1.02992
SYTL5:S211s	1.1553	2.91212
STK17A:S28s	1.1549	3.45547
AGFG2:S217s	1.15445	2.01181
TRIM22:S383s S384s	1.1541	1.72691
AMOT:S823s	1.153	3.11676
BRPF3:S928s	1.1523	3.07757
EIF3A:S949s	1.15145	3.66513
MAP7D1:S232s	1.151	0.713334
RBM3:S114s	1.15045	2.26062
FAM120A:S417s	1.1501	4.82233
GAB1:S547s	1.1492	2.84389
FGD6:S231s	1.14895	1.07296
REEP6:T178t	1.1484	0.853117
PRRC2C:S867s	1.14835	3.75169
ZMYM3:S263s S267s	1.1479	3.34977
KIF1B:S1011s	1.1479	1.68082
PRRT3:S808s	1.14745	2.37538
TCEAL4:S245s	1.14725	3.03466
CISD2:S69s	1.14655	1.05096
CEP170B:S355s	1.14625	3.38625
ABCC3:S908s S911s	1.1461	1.49729
VAMP8:T48t	1.14605	3.07514
EPSTI1:S239s	1.14595	0.455472
CAMSAP1:Q736q S738s	1.1452	2.04568
EPS15:T663t	1.14515	2.377
DLG5:S866s	1.1444	2.95064
RBM41:S6s	1.1442	1.17192
CLIC6:S377s	1.14405	1.09687
TSC2:S923s	1.1439	2.32716
RBM10:S910s	1.14345	2.7537
FNBP4:N149n T174t	1.14335	1.91431
C9orf152:S88s S90s	1.143	1.57907
MLLT1:S322s S323s	1.14275	0.775356
DDB2:T148t	1.1423	0.687268
MAPK15:S415s	1.1419	2.04951
LCA5:S87s	1.14175	0.293406
DOP1B:S681s	1.14095	2.65221
COL19A1:S81s	1.1409	1.88916
PPL:S887s	1.1404	1.3227
PPM1J:S66s S76s	1.13935	1.90322
ITPR3:T1580t	1.13925	1.36992
CD74:S8s	1.13905	2.15058
RALGAPA1:S1234s	1.139	1.60382
MAST4:S914s	1.13865	0.165885
PKP4:S290s	1.13855	1.25689
KIAA1522:S573s	1.1384	2.83622
NHSL1:T862t	1.1377	1.57999
FRY:S2649s	1.1376	2.713
TJP2:S325s	1.1373	3.30037
ANK3:S1720s	1.1372	4.13122
RALGAPA2:S694s	1.1361	1.92753
MPHOSPH8:T385t	1.13605	1.79518
ARHGAP17:S497s	1.136	1.41236
UBE2O:S515s	1.1359	0.861961
HOOK2:S710s	1.13555	0.77247
TCEA1:S57s	1.135	3.4358
TFRC:S34s	1.1349	2.18347
MAP1B:S1252s	1.1343	1.54169
ACACA:S2s	1.13345	3.33313
TRIM2:S440s	1.133	1.1384
USP54:S1106s	1.1327	1.39994
MTMR3:S903s	1.1325	1.69045
C1orf116:S281s	1.1324	4.47281
RPS6KA1:T734t	1.1323	2.43404
AKAP9:S3637s	1.1321	2.38934
ANLN:S99s	1.1318	1.00363
PRRC2A:S1386s	1.13155	2.90178
BUB1B-PAK6:S347s	1.13115	2.70716
MICAL2:S765s	1.13065	2.66468
CNKSR1:S300s	1.13035	5.13534
JMY:S902s	1.1294	1.53984
SEC62:S313s S315s	1.1293	0.72505
NR3C1:S132s	1.12915	0.759564
CCDC88C:S1887s	1.12875	3.45327
CSE1L:S931s	1.12855	0.335448
PDAP1:S170s	1.1285	4.99814
PARP4:T1493t	1.12815	3.08226
FBXO44:S223s	1.12735	1.37992
AP4E1:T849t	1.12705	1.71547
DSG2:S701s	1.12685	1.24233
TJP3:S863s	1.1268	0.747963
MTUS1:S1224s	1.1266	0.894752
MAP7:T265t S276s	1.12625	2.67053
WEE1:T190t	1.1258	0.873141
OFD1:S899s	1.1253	2.33147
ATG2A:S403s	1.1251	1.73123
AHNAK:S886s	1.1251	1.62727
SLC4A4:S233s	1.1249	0.758925
PPP2R3A:S155s	1.1247	1.70141
PTPN13:S887s	1.1245	2.26906
CAMSAP1:S431s	1.1245	1.28011
ARL6IP4:T232t	1.1241	2.05344
C1orf116:T295t	1.12385	2.52309
SCRIB:S37s	1.12375	3.16125
TAF7:S171s	1.1236	2.76562
LRRC41:S326s T327t	1.1232	1.10193
WDFY3:S3335s S3339s	1.12305	1.40126
CDK16:S184s	1.1228	2.17313
TNIK:S610s	1.1226	2.25074
PUDP:S65s	1.1222	2.03443
KIAA1522:T221t	1.1219	2.76269
EEA1:S15s M47m	1.12185	2.35168
EPN3:S506s	1.1214	1.14405
KMT2A:S3662s	1.1208	1.46455
TNKS1BP1:S1158s	1.1204	0.873473
SMARCAD1:S79s	1.1201	2.71638
NEDD4L:S483s	1.11995	0.271405
MLPH:S524s	1.11975	0.999035
WWC3:S551s	1.1191	3.24162
DSP:S2553s	1.1191	0.55127
SHROOM2:S325s	1.1186	1.55243
UTRN:S1258s	1.11835	3.55225
ELOA:T397t	1.1183	1.75393
RIN2:S534s S535s	1.11795	1.16344
LMTK2:S418s	1.11675	3.55295
FAM166B:S217s	1.1165	1.14803
NKX2-1:T39t	1.11645	3.36416
APC:S2742s	1.1163	1.56088
PTPN13:S969s	1.11575	2.897
KIAA1211L:S951s	1.1154	2.57117
UBN1:S978s	1.1154	2.45612
FAM13A:S537s	1.1152	1.76166
SLC4A4:S257s	1.11485	1.26436
BIRC6:S3578s	1.114	2.48446
RBM5:S576s	1.11345	3.42562
MYO18A:T99t S101s S102s	1.1129	2.37245
CDC42BPA:S1631s	1.11255	0.504249
SLC9A6:S657s	1.1124	2.772
GPHN:T319t	1.1122	1.81547
ACIN1:S825s	1.1115	2.57984
GPR39:S380s S384s	1.1112	1.08398
TRIP11:S1335s	1.11	2.98201
TTC25:S624s	1.1098	0.128332
RUFY4:M347m S349s	1.1097	1.11336
JPH1:S475s S479s	1.10955	2.04546
DLG5:S972s	1.10935	2.46129
RPAP3:S391s	1.10915	0.0511564
CTTN:S11s	1.10905	0.72797
PARP10:S155s	1.1088	0.577551
PPP1R13L:S292s	1.1086	3.25519
HECTD1:S1571s	1.1085	5.15476
CELSR1:S2761s S2764s	1.1084	2.62789
EGFR:T693t	1.10815	2.7534
ELOVL5:S300s	1.10805	2.41713
SORBS2:S13s	1.108	2.38608
OPHN1:S652s	1.10675	2.84235
TRIM2:S424s	1.1064	2.9277
COBL:S324s	1.10605	1.98995
ZFYVE19:S213s	1.10575	4.46772
TLE3:T312t	1.1055	2.52128
MTUS1:T1204t	1.1054	1.11458
PEX3:S201s	1.1054	0.509059
SH2D4A:S51s	1.10455	2.03852
ERBIN:S1253s	1.1044	2.11035
ZNF185:S466s S470s	1.1036	3.03282
SSH3:S602s	1.1028	1.53165
FARP2:T430t	1.10265	3.29863
CAMSAP2:S980s	1.10225	4.20057
ARHGAP20:S333s	1.1021	1.76234
RERG:S181s S182s	1.1015	1.36597
DCLK1:S332s S334s S337s	1.10125	1.4656
MAP2:S833s	1.10105	1.68744
MMACHC:S247s	1.10085	2.60782
COBL:S284s	1.0997	2.0336
SHROOM3:T817t T820t	1.0997	1.24133
OPHN1:T753t	1.0997	1.01292
ESYT2:S665s T673t T677t	1.0993	1.49531
FXR2:S634s	1.09925	1.40377
NUMA1:S2026s	1.099	0.825486
LEMD2:S499s S501s	1.09885	0.979796
EVPL:S1791s	1.0974	1.58017
ANK3:S920s	1.09645	3.6649
CIT:S2013s	1.0958	1.10275
NBEAL1:S2679s	1.0957	1.87257
MAP1S:S657s	1.0947	2.54098
SH3PXD2A:S1024s	1.09445	1.95724
LMO7:S550s	1.0938	0.736647
SLC4A4:S400s	1.09375	0.659824
NUMA1:S2047s	1.0935	2.98089
ATP1A4:T644t T646t S659s	1.09325	1.83983
IRF5:S158s	1.0926	1.39208
PHKB:S20s	1.09235	4.50569
CRYBG1:S141s	1.0917	2.61395
TBC1D5:S752s	1.0915	2.55727
STK33:S87s	1.0915	1.32062
KIAA1522:T652t	1.09085	1.54618
SEC63:T537t	1.09075	1.38828
ARHGEF38:S317s	1.09075	0.333236
PLEKHA6:S314s	1.09045	2.85651
NHS:S1062s	1.0902	0.17193
POMT2:S41s	1.09005	2.01956
CUX1:T753t	1.08995	1.10921
TMEM87A:S115s	1.0896	0.368901
ITPRID2:S354s	1.0895	1.05029
STK39:S371s	1.08915	1.41014
PTK2:S843s	1.08885	2.53513
SHROOM3:S242s	1.0881	1.74472
EEF2K:T353t	1.08795	2.2752
MPLKIP:T120t	1.08785	1.82868
EIF4G1:S1201s	1.08755	0.806954
CELSR1:S2871s S2873s	1.08725	1.57784
PARD6B:S11s	1.08605	3.22771
CAMSAP1:S1232s	1.08595	1.6802
NDRG1:S2s	1.08485	3.16755
RAB11FIP1:S435s	1.0848	1.80545
CDK5RAP2:S947s	1.0835	1.99437
MACO1:S305s	1.083	2.86692
PPL:S1310s	1.083	1.54736
GAB2:S281s	1.0819	3.12158
ANLN:T364t	1.081	1.15634
HEXIM2:S76s S81s	1.08075	1.91822
RIPOR1:S40s	1.0803	0.850499
ZNF608:S1270s	1.08015	3.16324
REM2:S295s	1.07985	0.433349
AHDC1:S1507s	1.07925	4.5033
DLGAP1:S419s	1.07925	0.649575
STBD1:S211s	1.07875	1.54551
MTOR:S2454s	1.0787	2.01297
TP53BP2:T592t	1.07855	1.61284
EEA1:S15s S18s	1.0782	1.17122
SRCAP:S3126s	1.07715	3.0045
CCDC88C:T1429t	1.07715	1.40314
PPP1R1B:S102s	1.0771	1.14988
NAP1L1:S10s	1.07705	0.979658
APC:S2392s	1.07675	2.47338
EML4:S134s	1.07565	3.98182
KMT2D:S1263s S1270s	1.0756	2.02281
MAP1B:T1633t	1.0755	0.81519
CAMKK1:S79s	1.07515	0.85954
NIPBL:S850s	1.0746	1.01542
FOXA2:T303t S315s	1.07395	2.24616
KDM2A:S427s	1.0739	3.76872
C5orf24:S121s	1.07275	3.75335
CCDC107:S254s	1.07275	1.39599
PLCH1:S1255s	1.0725	2.3894
ARFGAP1:S343s S348s	1.0723	1.05683
MACF1:S2454s	1.07215	4.66263
TLE1:T322t	1.0721	4.05154
NACAD:S1121s	1.072	1.21705
EXOC8:S32s	1.07195	1.90909
PPP4R2:S364s	1.0719	2.6563
PLEKHA5:S494s	1.0715	1.15687
SPIDR:S15s	1.0715	1.09998
SVIL:S905s	1.0714	1.4297
ZRANB2:S188s	1.0712	2.91358
KIAA1551:S1603s	1.071	0.844805
FAM83H:S1003s	1.0708	4.22327
RRAD:S39s	1.0697	2.17522
WAC:T457t	1.06945	2.66591
MICALL2:S318s	1.06935	0.962767
MICALL2:T330t	1.06915	2.06592
PDXDC1:S722s	1.06885	2.88946
ELFN2:S619s	1.0687	0.648775
TBC1D30:S581s	1.0681	1.95006
TPSB2:S219s	1.0678	1.84057
ADCY9:S611s	1.06705	2.64739
RAPH1:S845s	1.0669	1.50413
RALGAPA1:S349s	1.0664	2.66875
CARD9:S498s	1.0661	2.06181
ELOA:S373s	1.0661	1.19911
CARMIL1:T1228t	1.06605	1.02579
CAST:S582s	1.06565	1.98208
MYBL2:S454s	1.0655	0.703591
MTFR1:S290s	1.0651	1.76815
COBLL1:M325m S326s T330t	1.0647	1.66217
DMXL2:S451s	1.0647	0.833634
KIAA1211L:T837t	1.0639	1.99569
CKAP5:S1861s	1.0631	3.24285
SIPA1L3:S391s	1.06305	2.58883
SVIL:S914s	1.06285	0.981992
MPHOSPH9:S874s	1.0628	2.35155
SOX13:S324s	1.0622	1.47467
SNX2:S2s	1.06195	1.69644
EDC4:S871s S879s	1.06165	1.54973
KIAA1191:T36t	1.06105	2.52704
ARHGEF38:S582s	1.0606	1.37992
ARHGAP42:S600s	1.06055	1.02445
VAPB:S156s	1.06055	3.70648
EEF2K:S470s S474s	1.06025	3.96146
ZC3H12C:S612s	1.06	1.6802
RANBP2:S1509s	1.0598	2.50637
KDM6A:S691s	1.0596	2.73518
FHOD1:S1078s	1.05935	1.62511
KAT5:T536t S541s	1.0584	1.65084
HERC1:S2874s	1.05805	1.78258
MECOM:S1156s	1.0577	0.405702
SYTL2:S572s	1.05685	1.07819
SPAG9:S242s	1.0565	2.09994
STMN1:S31s	1.0562	3.26581
THAP9:S896s	1.0556	1.41711
C7orf43:S495s S498s	1.05555	1.38813
SLC22A3:S537s	1.05425	0.999438
EPB41L1:S541s	1.05325	2.18347
EPB41L1:S639s	1.0529	3.00997
TRIM66:S125s	1.05265	1.73152
PDXDC1:S30s	1.0523	1.70582
NDC1:T410t	1.0517	0.77685
PHACTR4:S636s	1.051	2.66222
ANK3:S1406s	1.04925	2.29508
CERS4:S342s S349s	1.04865	2.89753
CTTN:S432s M448m	1.04865	1.48036
ARHGEF12:S674s	1.0484	2.70204
NFIX:S265s S268s	1.04835	2.05091
TRIM2:S440s S443s	1.0483	2.24162
HTATSF1:S494s S498s	1.0479	3.08045
MBP:S40s N55n S59s	1.0479	0.129241
SLF2:S50s	1.04775	2.08458
ATRX:T1346t S1348s S1352s	1.0475	0.879097
OCLN:S25s	1.0473	2.48249
USP20:S333s	1.0468	5.37795
SETX:S1148s	1.0465	0.7487
UBAP2L:S992s	1.04635	0.750289
HJURP:S486s	1.0463	0.457637
LIMA1:S230s	1.04595	1.26319
PPL:S422s	1.04595	0.811458
SHROOM1:S224s	1.04525	1.88889
FGA:S588s	1.04505	0.49818
NFATC2IP:S220s	1.045	1.35103
ANLN:S225s	1.04475	1.50456
KLC2:S428s	1.0447	1.7979
USP24:S1299s	1.0446	0.557026
ZCCHC8:T496t	1.04435	1.76286
GPATCH2:S284s	1.0442	2.18489
UNC13B:S176s	1.044	1.28639
MYO9A:S755s	1.0431	0.248642
TOR1AIP2:S136s	1.04265	1.76523
PPFIBP2:S389s	1.042	3.70828
WIPF2:S144s	1.04145	2.0297
RAI1:T1297t	1.0412	0.819707
BRPF3:S900s	1.0411	1.24786
SH3RF1:S727s	1.0407	0.529009
LAMTOR1:S45s	1.04045	2.10063
ARHGEF2:S693s	1.04025	1.29678
CAST:S494s	1.0397	4.83471
TPPP3:S142s	1.03935	1.17557
KIAA1522:S604s	1.03885	2.49081
ABCC4:S629s	1.03755	0.825374
COBL:T278t	1.03735	4.22657
CDK13:T1246t	1.03705	3.56898
BNIPL:S88s	1.0368	0.687005
SHC1:Y318y	1.0367	1.53799
TCEAL4:S156s	1.0358	1.20803
DDX42:S717s	1.0357	2.40035
EPB41L4B:S401s	1.0355	1.8235
ASNSD1:S636s	1.0355	0.579486
ANKRD34B:S432s	1.0353	1.53674
CLASP2:S241s	1.03495	1.65937
CDK18:S117s	1.03405	1.9352
MAP1B:T908t	1.03385	0.957677
NKRF:S587s	1.03315	2.40592
ARHGAP35:T771t S773s	1.0331	3.71643
BCAR3:S471s	1.0328	1.27556
CD74:S25s	1.0324	3.32569
PLCH1:S1494s	1.0323	1.53728
HDLBP:S727s	1.03215	0.373329
PHLDB1:S314s	1.0319	0.772087
SUN2:T33t	1.03185	0.804019
TTC39B:S120s	1.03145	1.03307
KANSL1L:S769s	1.031	1.44284
UBR3:S1053s	1.0307	2.3764
HUWE1:T3927t	1.0306	0.818091
NUCKS1:S229s S234s S240s	1.03015	1.63725
YTHDC1:S119s S122s	1.02965	0.484168
PTPN13:S1026s	1.0295	0.7779
SLC34A2:S681s	1.02945	3.43285
TMEM159:S8s	1.0283	1.67233
NKX2-1:S48s	1.0282	1.09376
LEMD2:S166s	1.028	1.35103
ARHGEF16:S208s	1.02785	1.72757
DLG1:S138s	1.0277	1.41387
HSP90AB1:S452s	1.02705	0.544727
MAP1B:S1793s	1.02655	1.21045
USP43:S844s	1.026	2.13042
ZFHX3:S2801s	1.0255	2.93988
GRAMD2B:S59s	1.02545	1.11399
FAM83H:S1025s	1.0245	1.54551
MACF1:S5324s	1.0243	1.69134
PCM1:S1758s S1761s S1769s	1.02425	1.72051
ATF2:S90s	1.0238	2.25403
MAGI3:S1396s	1.0237	1.32134
PDE4DIP:S2316s	1.0236	1.94579
ASB16:T112t T119t	1.0236	0.714048
TSC2:S1348s	1.0231	2.73697
TP53BP2:S720s	1.023	5.41516
HOPX:S70s	1.02255	0.551427
ARL6IP4:S231s	1.02235	3.66513
TMEM131:S1619s	1.02195	4.24739
PLEKHA7:S604s	1.0219	1.93126
USP54:S424s	1.0219	1.68098
KIAA1217:T166t	1.02165	1.93439
KALRN:S1799s	1.0214	2.90779
SNW1:S33s	1.02115	2.4915
PRPF4B:S87s S93s	1.0207	0.0288411
NRBP2:S361s	1.02065	1.79048
KDM3B:S552s	1.02065	0.293129
IQSEC2:S207s	1.02065	1.58744
GRHL1:S76s	1.0202	2.01677
NFIX:T267t	1.01955	2.7763
CDC42BPA:S1638s	1.0188	0.894752
CCDC88C:S1825s	1.0184	0.225972
DBNL:M276m T279t	1.01835	1.64421
TMEM39B:T49t	1.01815	2.64557
KDF1:S158s	1.018	2.00689
ERICH2:T328t	1.018	1.90346
DDX17:T45t	1.0178	1.76269
LIMCH1:S591s	1.0178	0.705209
ATP7A:S1463s	1.0172	2.15513
DMXL2:S2400s	1.0172	1.3119
BSDC1:S233s	1.017	1.57773
PPP1R12A:S929s	1.0163	0.615408
AGGF1:S344s	1.01585	2.92926
GLYR1:S130s	1.01585	2.71638
CEP170B:S1109s	1.01575	5.34421
ARFGEF3:S2079s	1.0154	2.27156
C1orf226:S301s	1.0154	0.627057
SRGAP3:S922s	1.0153	1.264
CHD4:S145s	1.01515	0.445507
PRRC2A:S166s	1.0151	1.38489
HSPB8:S57s	1.01455	2.03029
PPP2R5D:S573s	1.0144	3.00997
SHROOM3:S1441s	1.0141	2.06145
RALGAPA2:S698s	1.01385	0.510328
FGFR1OP:S301s	1.0133	0.802941
KIF13B:S1379s	1.01325	2.19923
SHROOM2:T755t	1.01305	0.561631
CGN:S276s	1.0128	2.86954
SMG7:S557s	1.0128	2.80243
SGSM1:S512s	1.0128	1.58048
TRAPPC10:S1209s S1212s	1.0125	1.30033
BCAR1:S740s	1.012	1.53857
NKX2-1:S284s	1.01075	3.17815
RABGAP1:S501s S508s	1.0107	1.2026
MTSS1L:S456s	1.01055	2.06306
ID4:S5s	1.0105	1.16912
PALM3:S420s	1.01035	1.67304
POLE:S1297s	1.0103	0.545855
FAM83H:S936s	1.0102	3.42205
DENND5A:S834s S836s	1.01015	0.254138
PLEKHA7:S363s	1.00975	1.28942
AHSA1:N169n S172s	1.00885	1.38556
GRIP1:T920t	1.0082	1.47466
GOLGB1:M2745m S2746s	1.0081	1.31037
EBAG9:S86s	1.00785	3.83744
SLC4A4:S12s	1.0078	1.69339
FAM120A:S960s	1.00775	0.86858
ARHGAP12:S103s	1.00715	1.33119
RALGAPA2:S768s	1.0069	2.76269
EVC:S81s	1.0068	0.950879
PTPN13:S911s	1.00675	1.12455
MEPCE:S330s	1.0067	3.23034
RPRD2:S356s	1.00635	0.401019
KIAA1211L:S51s	1.0062	0.36927
FILIP1L:S594s	1.00575	0.935993
ARHGEF2:T136t S146s	1.0056	2.77762
EIF4H:S21s	1.00545	1.6078
TMEM201:S454s	1.0054	3.73942
SEMA6D:N993n S996s	1.00535	1.65096
TLE3:S201s S203s	1.00505	3.44336
RAB3GAP1:S379s	1.00495	3.49018
SLC9A7:S694s	1.0047	2.17057
AFDN:S1234s	1.0045	2.29817
EPB41L1:S870s	1.0044	2.8282
PLEKHA6:S842s S848s	1.004	2.09433
ERBB2:S819s	1.004	0.53971
CAMSAP3:S1031s	1.0038	1.11532
VSIG2:S312s	1.0029	1.12894
MAP1B:S1779s	1.0026	0.873473
GPR39:S427s S430s	1.0025	1.21424
PTGES3:S43s	1.00245	0.238459
NASP:T123t S127s	1.0019	1.64588
HTATSF1:S385s	1.00125	1.33663
TRAFD1:S491s	1.00105	1.12859
SFTA2:S70s	1.00105	0.808267
WDFY3:S3339s	1.001	0.900109
DSG2:S700s S701s	1.0007	0.882871
ARHGAP39:T505t	1.00025	1.44829
CIAPIN1:C285c S287s	0.99935	2.63403
ZNF655:S519s	0.9989	1.12491
DCAF11:S121s	0.9983	1.38589
ANKRD50:S1417s	0.9982	3.23992
MIA2:T1009t	0.998	1.1938
CAMSAP2:S464s	0.9977	2.34435
EIF4G3:S239s	0.99765	1.74744
ADAR:S629s	0.9967	2.09058
ARHGAP21:S671s	0.9966	0.439865
ATXN1L:S284s	0.9964	1.97124
TOP2A:S1374s S1377s	0.99605	1.31854
WBP1:S212s	0.996	1.39413
TBC1D5:S723s	0.9959	0.856037
TEF:S32s	0.99585	1.81878
ZC2HC1A:S318s	0.9957	2.44691
PBXIP1:S72s	0.9957	2.07794
TJP1:S155s	0.9954	0.659861
DENND1B:S653s	0.99525	2.38608
SYNJ1:T1131t	0.9952	2.72553
USE1:S154s	0.99475	1.74024
APBA1:S263s	0.99465	1.85074
INPP5B:S214s	0.99455	1.29673
MAP7D1:T585t	0.9942	0.546051
BLVRA:S237s	0.9934	3.76159
MTMR12:S716s	0.9932	1.70198
ITPR3:S2670s	0.9929	1.87042
MAP1S:T460t	0.9926	3.74159
PLEKHG1:S1170s	0.9925	4.04896
KANK1:S186s	0.99235	2.46824
KIAA1522:S506s	0.9923	1.16852
MLH3:T661t	0.9919	0.0704262
KDM2A:S390s	0.9918	3.61803
TJP2:T1027t	0.99175	1.59743
ARAF:S265s	0.99165	0.873679
GPSM2:S565s	0.9915	2.62551
MLLT3:S412s S419s S429s M431m	0.99135	1.56192
ICE2:S605s S624s	0.99125	2.97026
MAD2L1:S195s	0.99115	1.27778
HNRNPH1:S123s	0.99115	1.23419
EDC4:S1389s	0.9897	3.16755
TKT:S353s	0.98955	1.16366
BCAS1:S552s	0.9895	0.347539
PTK2:S840s	0.9894	1.26112
CTNND1:S847s	0.9891	3.22771
KTN1:M1324m S1327s	0.98875	2.73621
HLF:T58t	0.98865	0.178737
FAM13A:S326s	0.9885	1.27496
CROCC:S1619s	0.9881	1.55334
ERBB3:S1130s	0.98805	1.88494
TOP2B:S1400s T1403t S1413s	0.9879	1.06347
APLP2:S223s	0.98775	1.22276
GLCCI1:S223s	0.98725	2.84706
RALGAPB:S415s	0.98645	3.63706
SMARCA4:S1449s S1453s	0.9864	2.7596
UBE2T:S184s	0.9863	0.550823
FAM83H:S411s	0.98625	3.1807
PRKDC:S2695s	0.98595	1.12982
CBFA2T3:S564s	0.98585	0.615839
TJP3:S173s S178s N181n	0.9858	1.31831
CLEC16A:S7s	0.9856	2.43777
NR3C2:S283s	0.9853	2.27273
EXPH5:S738s	0.9851	2.45164
CSRP1:S81s	0.98455	0.149183
SEC16A:S534s	0.9845	1.35822
STAC2:S48s	0.9845	0.501733
PRDM16:S549s	0.98405	1.98208
EIF2B4:S12s	0.9836	0.250442
PRKAG2:T156t S164s T165t	0.98315	1.29777
CIT:S2035s	0.98315	0.673022
HIVEP3:S720s	0.9828	3.61991
PITPNM3:S946s	0.98275	1.73124
TRIP6:T162t	0.9827	1.18882
UNG:T60t	0.9826	1.65128
GEMIN5:S757s	0.9825	1.63706
CAST:Q152q S154s	0.98225	1.22987
KDF1:M155m S157s	0.9821	1.72403
NUBP1:S312s	0.98205	4.45796
MAGI3:S272s	0.982	1.18239
ESR1:S167s	0.98155	0.837318
HABP4:S97s S108s	0.9815	2.27736
AGAP1:S339s	0.98145	1.36186
ARHGAP20:S46s	0.9813	2.30903
SETD2:T1872t	0.98105	0.456772
MAP7:S276s	0.98095	1.27298
PRRT3:S815s	0.98035	1.30543
MRTFB:S924s	0.9802	1.52172
R3HDM2:S921s	0.9802	1.12782
MAP3K7:S417s	0.98	3.10798
HTATSF1:S403s S407s	0.98	0.988028
LYST:S1061s	0.97975	1.22258
MYO9A:S1223s	0.9793	1.60177
PCNP:T141t S142s	0.9788	0.706275
TSC2:S960s	0.9785	0.899272
DENND4C:S1233s	0.97835	1.55246
HMGN1:S21s	0.97815	0.8252
DLG5:S1666s	0.97795	2.72056
ZNF768:S139s S144s	0.9779	1.91052
ENDOV:S289s	0.9778	1.11684
ZNF608:T1274t	0.9774	1.0485
MAP1S:S481s	0.9765	1.83016
AGFG1:S317s	0.976	2.22384
ICA1:S324s	0.9759	0.941556
HNRNPA1:S199s	0.97585	3.40017
AHDC1:S1403s	0.97565	2.12217
SVIL:S707s	0.975	1.35062
CEP170B:T353t	0.97485	2.06948
EIF5:S121s	0.97485	0.0555135
PLEKHA6:S808s	0.9748	2.12609
SLC9A1:S703s	0.97475	1.9352
ADAM9:S799s	0.97385	2.49965
SH3RF1:S108s	0.9738	2.88872
FAM83H:S1098s	0.9738	1.00416
ATXN2L:S306s	0.97355	1.01284
RBMX:S332s	0.97255	2.42276
LTBP2:S250s	0.9725	1.01032
CCDC88C:S1496s	0.9725	1.08081
SASH1:S746s	0.9722	1.61683
SLC4A4:S65s S68s	0.97125	0.648679
CNOT1:S1481s	0.97085	0.745677
GPR39:S396s	0.9703	0.283858
MED26:S289s	0.97	2.25808
LYSMD1:S23s	0.9699	1.81225
FBXL4:S268s	0.9693	1.60005
TSC22D4:S123s	0.9688	1.54734
LIMA1:S93s	0.96875	2.93356
R3HDM2:S347s	0.96795	1.44491
PRKAB2:S61s	0.9679	1.56891
CDC42EP3:S124s	0.967	0.621984
TBC1D9B:S754s	0.9668	1.3119
BOD1L1:S1077s	0.96665	3.21764
SYTL2:S512s	0.9665	1.37018
GPRC5C:S476s	0.9662	0.669803
PTPN13:S1740s	0.96615	2.13385
PLEKHA6:S842s	0.96565	3.85032
SPAG9:T226t	0.965	2.22501
MAP1B:S1154s	0.9649	2.01654
USP24:T1289t	0.9649	1.75506
MAPKBP1:S1314s	0.9649	1.39572
LRCH4:S432s	0.9646	1.95579
LMBRD2:S610s	0.96455	1.4951
XRCC1:T257t S266s	0.9644	1.0381
PLEKHA7:S903s	0.9644	2.22493
C1orf116:S453s T456t	0.96415	2.12579
DNMT1:S141s S143s	0.964	1.12832
ICE1:S1838s	0.96395	1.33419
CDC42BPB:S1659s	0.96385	0.818091
PABPN1:S301s	0.9633	1.27041
MAP4K2:T427t	0.96295	0.770324
SNX9:S116s	0.9628	1.96822
PITPNM3:S30s S31s	0.96235	0.476956
DENND5A:S851s	0.96125	2.01761
CCDC130:S40s	0.9608	1.63322
MAP3K21:M302m T304t T307t Y308y M311m	0.9608	0.538883
SETD1A:S1545s	0.9602	1.17275
TXLNG:S69s	0.9599	2.17283
MAP1S:S472s	0.9596	2.90403
FAM126A:S433s	0.9594	2.14323
MARK2:S380s	0.9594	1.52306
NFIA:S268s	0.9593	1.63387
PRRC2B:S418s S419s	0.9589	0.236188
PCNT:S44s	0.95865	2.86599
RPS6KA3:S415s	0.95865	2.18347
KIF16B:S573s	0.9585	2.23508
ARHGAP35:S770s	0.9582	4.62615
SLC5A3:S559s	0.9578	0.237156
KIF16B:S662s	0.9573	1.6478
EIF5:S419s	0.95695	1.62988
C6orf106:S215s	0.9568	0.623924
PLEKHG1:T888t	0.95675	1.41639
CUX1:S1507s	0.95665	1.06843
PDLIM5:T355t	0.9564	0.253384
RALGAPA1:S2117s	0.95635	1.71496
WIPF2:T191t	0.95555	1.12853
ANGPT2:S58s	0.95495	0.616287
ZSCAN20:S12s	0.9548	1.99922
PDE4D:S126s	0.9546	0.631282
TPPP:S159s	0.9545	1.79796
EPB41L4A:S591s S593s	0.9539	0.663286
MICALL1:S612s S621s	0.9537	2.3466
LIN9:S81s	0.95345	0.848744
SPAG9:S691s	0.9531	2.24162
MARK3:S601s	0.95285	2.77602
FAM83H:S1061s T1065t	0.95275	1.21731
HOOK1:S235s	0.95245	2.64513
VPS13D:S2093s	0.9523	1.09719
COBLL1:S344s S356s	0.9513	2.22946
PTPN13:S936s S938s	0.9511	1.57612
NFIX:S265s	0.95055	1.53857
PIAS4:T99t	0.95045	1.5548
ZHX2:S625s	0.94995	2.02924
MAP2:S1742s	0.9499	3.07627
KMT2C:S1307s	0.9499	2.80542
PPP1R9A:S840s	0.9498	3.44284
DHX30:S6s	0.9497	0.497062
PELO:S238s S247s	0.94965	0.820037
SZT2:S1168s	0.94945	1.26846
PEAK1:S1237s	0.9486	0.610684
LRBA:S1671s	0.9484	1.54972
RAB34:S298s	0.94765	0.332602
CNBP:S123s	0.94755	2.10414
TANC2:S169s	0.94615	0.687629
AP1AR:S175s S186s	0.9457	2.42967
ESYT2:S710s S711s	0.9457	1.18972
RGS3:S726s	0.9455	2.482
PITPNM3:S928s	0.94535	4.11979
TRIOBP:S1318s	0.94525	0.550834
VPS53:S524s	0.9451	1.8814
STX17:S289s	0.94495	4.24644
DENND1B:S612s	0.9444	1.5753
RHBDF1:S346s	0.9441	2.12001
MAML2:S53s	0.9439	1.79924
PPL:S14s	0.9425	2.7534
MINDY4:S352s	0.9424	1.68446
ANKRD17:S1457s	0.9421	1.64508
RICTOR:S1144s	0.942	2.56915
ESYT3:S697s	0.9419	2.56191
CSNK1D:S382s	0.94185	3.43245
AKAP13:S2720s	0.94175	1.65138
PPP1R9A:S160s	0.94145	0.813594
TRIM2:S370s S375s	0.941	2.30473
ZDHHC5:S345s T348t	0.9408	3.54113
KIF1B:S1099s	0.94075	1.35806
SMARCA5:S137s	0.9401	1.36716
MAGI3:S991s	0.9397	1.29901
SLFN13:S170s	0.9389	1.53978
KIAA0319L:T974t S978s	0.93885	1.93389
AHDC1:S1187s	0.9388	3.88179
SECISBP2:S296s	0.9384	1.25033
SHROOM2:S208s	0.9379	1.31282
EIF4ENIF1:S173s	0.93765	2.61466
MTSS1L:S274s	0.93765	1.84578
EMD:S87s	0.93755	1.862
VPS13D:S2671s	0.9368	1.0661
FMN1:S75s N76n	0.9364	2.45128
PTPN9:S557s	0.9363	1.45888
SHROOM4:S1019s	0.9361	1.4031
SH3RF1:S724s	0.9361	0.856553
CGN:S155s	0.9358	3.66513
ZNF318:S991s	0.9356	1.00488
SPATA7:S194s	0.9355	2.79116
HECW1:S68s	0.9346	1.10927
CCDC88C:S1601s	0.9344	2.29105
ZNF608:S473s	0.9341	2.72424
UTF1:S205s	0.93345	1.60127
SLTM:S1001s	0.9331	1.88363
ZNF185:S194s	0.93305	0.901028
GRAP2:S187s	0.933	1.32933
FMN1:S365s	0.933	1.32315
ZNF318:S512s	0.9328	2.40168
UBAP2L:T358t	0.93255	2.77092
RUNX1:S220s	0.93235	2.76512
PLCH1:S567s T568t	0.932	2.2092
LIMA1:S263s	0.93095	1.53857
JPT2:S144s	0.93055	1.74335
SPTB:S1226s	0.9303	0.519229
STMN1:S63s	0.9302	2.67962
RIN1:S292s	0.9301	1.83134
PDE4DIP:S1456s S1464s	0.93005	0.901497
CAMSAP3:S905s	0.9299	0.0538193
ARHGEF5:S983s	0.92985	1.06584
PPL:T16t	0.92935	0.972789
FOXQ1:S262s	0.92925	0.742488
PCBP2:S272s	0.92845	1.64956
SHROOM3:S403s	0.9284	0.521431
ANK3:S1462s	0.92825	3.0197
CEP170B:S1129s	0.92775	1.81516
KIAA2012:S913s	0.9277	1.10142
HPS4:S373s	0.92745	2.07752
INTS6L:S663s	0.92725	0.664656
CAMSAP2:S1319s	0.9271	2.23949
CEP170B:T1067t	0.9271	3.6089
PPM1J:S76s	0.92705	2.10123
TDRD3:S628s	0.92675	2.30055
SCAF11:S608s S614s	0.92645	0.640401
SNIP1:S74s S76s	0.92605	1.49427
DLG3:S255s	0.9255	0.679325
EVI5L:S560s	0.92545	2.1928
CLINT1:S496s	0.92535	2.02952
CYSLTR1:S313s	0.92535	0.286578
PLCH1:S460s S464s	0.9252	1.87358
CBX8:T234t	0.9251	0.807263
CDS1:S35s	0.9249	2.47012
PNN:S48s	0.9246	1.69208
ZNF423:S421s	0.9242	1.57047
CRYBG2:S224s	0.9242	0.521945
PARP10:S49s	0.9238	0.622961
RAB11FIP1:S500s S501s	0.9234	1.07408
CAMKK1:S485s	0.92325	2.49524
FAM83H:S516s	0.9229	1.41356
KMT2C:S3519s	0.9227	2.64314
CANT1:S21s	0.9225	3.85032
RANBP2:S2900s	0.9225	2.18347
KAT14:S285s	0.92245	1.43872
CLCN7:S60s S61s	0.9222	1.62168
CIAO1:C243c S248s	0.9219	0.0842143
LYST:S1510s	0.92175	3.67822
DOP1B:S1169s	0.9217	1.94298
PLEKHG1:S1282s	0.92155	1.6217
SEC22B:S137s	0.92155	1.26741
DOP1A:S716s	0.9212	3.69863
NEDD1:S404s	0.921	1.08272
ZDHHC8:S286s	0.921	0.313424
ARHGAP20:S730s	0.921	1.91244
FBXW9:T55t S59s	0.92025	2.57416
CAMKK1:S502s	0.92025	2.16766
SPATA2:S273s	0.9201	1.77501
MARK2:S376s	0.91955	1.18067
THADA:S1015s	0.9193	1.4381
FAM120A:S398s	0.9192	1.85513
SF1:S14s	0.9189	1.1837
KANSL1L:S87s	0.9188	1.21052
PTPN13:S1210s S1213s	0.9187	2.23614
CHAF1B:S538s	0.9186	0.66559
PPP1R13B:S383s	0.91815	1.70043
L3MBTL3:S670s	0.91745	1.64143
AHNAK:S3362s	0.91705	0.282892
ARFGEF3:S471s	0.9164	0.916266
ATXN2:S812s	0.916	1.5057
TLK2:T78t	0.91595	0.713571
EIF4G1:S1084s	0.91595	0.80603
MTUS1:S342s	0.91585	0.793241
TANC2:S1788s	0.91575	1.59255
APBA2:T306t	0.91575	0.00253545
CDC42EP4:S140s	0.9157	0.694374
BCLAF3:S192s	0.91545	2.03747
EML3:S207s	0.9138	3.84674
PCF11:T459t	0.91375	1.02953
KIAA1210:S314s	0.9136	2.23659
NFATC4:S314s S327s	0.9136	0.69617
ZC3H6:S188s	0.91325	3.39097
PHF2:S853s	0.9132	2.23273
C17orf75:S8s	0.9132	1.50413
TRIP12:S320s	0.9131	0.258305
CLIP1:S348s	0.91295	2.68878
PPFIBP2:C363c T367t	0.91285	4.16561
RANBP2:S773s	0.9128	1.6059
PPL:S1744s	0.9127	2.32335
EPS8:S57s S58s	0.9127	1.09493
PRRC2B:S168s	0.91205	1.27288
SHROOM4:S100s	0.91175	1.42303
KIF13A:S1652s	0.9117	2.16699
IFT122:S1206s	0.9117	0.579574
CRYBG1:S918s M922m	0.91165	0.134418
GAS2L2:S770s	0.91145	0.906389
FGD6:S605s	0.9113	0.993414
EPB41L1:S430s	0.91085	2.02494
RASSF8:S129s	0.91055	1.26741
TRIM2:T371t	0.9102	1.91301
PI4KB:Q556q S569s	0.91015	0.783873
LY75:S867s	0.91005	0.431997
COBL:S917s	0.90985	1.32474
MED26:T426t	0.90985	0.946659
ZNF318:S1558s	0.90915	1.1664
EVPL:S361s	0.90905	1.88192
CRYBG1:S484s	0.909	1.4031
CDC5L:T430t	0.90875	3.58637
GOLGA3:S140s	0.9087	0.800385
PI4KA:S230s	0.9085	2.93133
ZNF608:S1453s	0.90835	3.71013
FAM193A:S642s	0.90835	1.95915
ZNF704:S114s	0.908	1.88743
ARHGAP21:S612s	0.90795	0.845238
NHS:T1195t	0.9074	0.766224
TULP4:S1349s	0.90695	1.53535
SOGA1:S1436s	0.9063	0.403031
HECTD1:S1488s	0.90615	3.28845
EPB41L1:S69s	0.9061	2.86151
CEP170B:S410s	0.90605	1.25484
GRHL1:T208t	0.90575	2.36885
TRAFD1:S430s	0.9051	2.81275
FMN1:S231s	0.9051	2.10173
KIAA1210:S1441s	0.9051	0.854794
WDR55:S21s M22m	0.9051	0.961748
CCDC180:T1558t	0.905	1.25668
MIA2:M1253m S1255s	0.905	0.878774
RBM10:S775s	0.90475	1.87358
TSTD1:S94s	0.90395	1.38125
AGFG2:T163t	0.90395	0.962844
PPFIBP2:S541s	0.9038	0.875288
DIDO1:S1184s	0.90375	0.44037
TAB3:S645s	0.9037	2.24114
LHX6:N227n N229n T232t	0.90335	0.655249
TRIP11:S383s	0.9031	1.77525
MAST2:S862s	0.9029	0.171126
SQSTM1:S284s S291s	0.9022	2.52623
TSC2:S1342s S1348s	0.902	2.23462
MAP1B:S1512s	0.90185	1.1775
ZCCHC17:S136s	0.9018	2.98089
WWC1:S525s	0.90145	1.9104
SYTL2:S323s	0.9013	0.782587
ZNF281:S198s	0.9012	0.32648
APBA1:S242s	0.901	2.05332
RTEL1:S791s	0.901	1.28524
MAPKBP1:S1367s	0.9009	1.97587
CCDC13:S474s	0.9008	1.42372
MAP1B:S832s	0.9007	0.504843
DCUN1D4:S128s	0.9003	1.3457
MYO6:S604s	0.90025	3.0311
PCNX3:S287s	0.8997	3.18619
PLEKHG1:S682s	0.8994	2.67128
ZNF462:S1090s	0.8994	1.11096
SNX30:S16s	0.8992	3.68688
SIX4:S301s	0.8992	0.606684
MAP1B:S1899s	0.8985	1.50413
CCNO:S81s	0.8984	0.952076
RANBP2:T2846t	0.89815	1.51804
HTATSF1:S702s	0.89795	3.19669
NOB1:S325s	0.8978	0.521096
LPIN3:S225s	0.8977	2.3195
KDM3A:S766s	0.8977	2.04908
STX4:S36s	0.8975	1.40928
CARMIL1:S880s	0.8974	0.431344
BRPF1:S897s	0.89705	2.77103
MAP1B:S541s	0.89705	1.39648
RAI14:S341s	0.8967	0.982654
MAP1S:S896s	0.8965	0.897954
MAMLD1:S676s	0.8963	1.47286
AFDN:T1772t	0.8962	1.2427
DCP1B:S566s	0.89605	1.55632
FAM193A:S1208s	0.8958	1.989
FAM53B:S409s	0.8957	2.4091
NDRG1:S330s S333s	0.89565	2.42944
C6orf132:S260s	0.8954	1.99672
CRYBG1:S19s S22s	0.8951	0.893234
ITPR2:T1856t	0.8943	0.929939
JPT2:T61t	0.89405	2.1439
HIRIP3:S223s S227s	0.8939	2.25838
CLCC1:S532s	0.89385	1.16896
ATRX:S598s	0.89315	3.60089
MAVS:S419s	0.89315	2.23379
USP20:S390s S394s	0.89315	1.39265
MAP1B:T948t	0.8931	2.01235
CD2AP:S405s	0.8928	2.56979
EML3:S156s S157s	0.8928	2.05939
PLEKHA7:S430s	0.8927	2.23415
CCDC88C:S1806s	0.89255	1.68177
IWS1:M718m S720s T721t	0.8925	1.43394
CLOCK:S408s	0.89225	1.30181
TMCC2:T466t	0.89205	2.44875
DYNC2H1:S4031s S4036s	0.8919	2.17824
PPP2R5C:S39s	0.8918	2.33457
PLEKHA6:S476s	0.8914	0.459535
FAM213B:S110s	0.8913	2.74412
OSBP:S386s S389s	0.8909	1.95335
TMEM201:S466s	0.8908	2.80039
MAST4:S224s	0.89075	2.50822
SDC3:Y441y	0.8905	1.50853
PCLO:S895s	0.8901	1.08925
NT5C2:T518t	0.89	0.87796
GTF2I:T558t	0.88975	1.94298
BAD:S118s	0.88915	4.14267
ANK3:S1833s	0.88905	2.00894
LPXN:S132s M136m	0.889	1.49828
SHROOM3:S1221s	0.8889	1.63706
IKZF2:S56s	0.8887	4.11979
RALGAPA1:S1212s	0.8887	1.97343
SYNRG:S235s	0.8886	0.641122
PDE4DIP:S1483s	0.88845	1.0055
REM2:S68s	0.8882	0.884106
AFF4:S140s	0.8879	0.529738
SHROOM2:S1219s	0.8877	1.23985
ATP8A1:S9s	0.88715	0.535347
STIM1:S660s T665t	0.887	0.340531
STAP2:S272s	0.88685	0.752174
TMC5:S184s	0.88685	1.36662
ARHGAP45:S93s	0.8866	2.08278
UPF3B:T410t	0.8866	3.46383
STAC:S279s	0.8861	0.60129
PHF12:S691s	0.8858	1.50578
C1orf174:S189s	0.8858	1.20622
TOR1AIP2:S13s	0.8857	1.42422
PUM2:S587s	0.8856	0.987808
C1orf116:T456t	0.88535	4.15989
ATL3:S535s	0.88535	2.66133
PRDX5:S182s	0.88525	1.10624
KIFAP3:S102s	0.885	0.806061
BRCA1:S1481s	0.8848	0.869794
PUM1:S709s	0.88475	2.74412
PLEKHA6:S705s	0.88475	1.7483
BLVRA:S235s	0.8847	4.66213
AFDN:S175s	0.8847	2.10983
DAGLB:S579s	0.88465	3.53723
STX6:S152s	0.8843	2.83762
KMT2C:S89s	0.88405	4.63672
PARG:S133s	0.8838	2.36474
TNKS1BP1:S1678s	0.8838	1.83047
WWC1:S523s S525s	0.8836	3.52147
EPRS:S817s	0.8829	2.39472
TOPBP1:T861t	0.8828	2.05119
FAM83H:S936s S945s	0.8826	1.13951
ARHGAP35:S1070s	0.88245	3.08825
ANK3:S1789s	0.8823	1.23609
TNKS1BP1:S14s	0.8822	0.452519
ABCC3:S864s	0.8821	1.4027
PLEKHF2:S226s	0.88195	2.41206
LIMA1:S709s	0.88195	1.3023
EPB41L1:T686t	0.8819	1.72389
PTK2:S843s S850s	0.88185	1.03077
MINK1:S993s	0.88175	2.19932
MAPT:S579s	0.88175	0.656658
KMT2E:S531s S538s	0.8816	1.55243
PCNP:T139t	0.8816	1.16246
RUNDC1:S501s	0.8815	2.33147
NME7:T340t	0.88145	1.79729
NFIX:S284s	0.88125	1.59033
HSPB1:S86s	0.8812	0.863601
NRIP2:S96s	0.881	1.41637
ARFGEF3:S1856s S1857s	0.8803	0.588173
RANGAP1:S442s	0.88025	0.471959
ZNF462:S1166s	0.87975	2.70071
ANLN:S658s S661s	0.87965	0.448412
HSF1:S136s	0.87955	1.6399
PALM3:S439s	0.8792	1.20253
RASGRF2:S726s	0.87905	0.152492
ULK1:S716s	0.879	3.28338
PLEKHA6:S459s S466s	0.879	0.339321
MDC1:T1406t	0.8788	0.530274
GRAMD1A:T57t	0.8787	0.832854
R3HDM2:S381s	0.87865	1.63853
CANX:S618s	0.87865	1.0388
PTPRU:S853s	0.87825	0.877298
PARN:S623s	0.87825	0.841058
TSSC4:S93s	0.8781	2.03744
MAP1B:T1864t	0.8779	0.514738
INPP5E:S232s	0.87775	2.45556
MBD1:T530t	0.87765	0.647005
PGRMC1:T74t	0.8774	1.34503
ARHGAP26:S591s S609s	0.8774	0.93197
KTN1:S926s	0.87645	1.05472
ATP1A1:Y55y	0.8761	1.28688
WDR74:S361s	0.876	1.9591
ALPK1:S721s	0.87595	0.763728
CRYBG1:S417s	0.8757	2.0958
SECISBP2L:S344s	0.8755	1.56458
ARHGAP35:S1236s	0.8755	1.53165
AFTPH:S865s	0.87535	1.49869
TP53BP2:S486s	0.87515	3.86136
YTHDF2:S2s S5s	0.8749	2.88516
MAST4:T1586t	0.8749	0.477468
CCPG1:T184t S186s S188s	0.8748	0.203329
CERS4:S342s S349s S350s	0.8748	1.58727
CWC27:S231s	0.8746	1.181
USP54:S399s	0.87435	0.880318
PTPN13:S2088s	0.874	2.208
SYDE1:S244s	0.874	1.52172
PLEKHA6:S777s	0.87365	2.67047
CGNL1:S297s S300s	0.8736	2.46776
KLC3:S167s S173s	0.8734	2.302
CRYBG1:S75s S81s	0.8732	0.206447
DLG5:S1263s	0.8731	1.77027
MAGI3:S659s	0.873	1.25595
ARHGAP20:S20s	0.87295	1.04709
MAP7:S257s	0.8729	0.757126
[truncated: 39,186 more rows]

## Sheet: KRAS mutant
Site	Log2FoldChange_proteomics	-log10(pValue)_proteomics
STOX1:T370t	-4.3412	3.00219
NPM1:K141k	-3.5233	1.4309
NA	-3.4714	1.87185
NA	-3.3653	1.72288
PMS1:S315s	-3.2344	2.47714
SPAM1:K7k	-3.135	1.36322
NA	-3.0869	1.69851
ANLN:S336s	-3.06615	2.79596
FGD6:S417s	-2.99945	2.23948
CYP2B6:S128s	-2.9157	2.81997
MFSD6L:S585s	-2.8759	1.19964
DCTN2:T64t	-2.80745	1.77853
NA	-2.7686	0.988501
PIGR:S682s	-2.7048	2.54147
PTPN11:Y62y	-2.6632	6.42585
RRAD:S273s	-2.65165	4.01465
CDS1:S9s	-2.6392	2.76082
VPS35:S121s	-2.6276	2.23091
IRX2:S186s	-2.6128	3.1219
NA	-2.5991	0.328778
NA	-2.592	3.04575
BET1:S48s	-2.58055	3.19396
AVL9:S582s	-2.57645	1.80089
HEPACAM2:S433s	-2.56795	0.461742
EPHB2:S776s	-2.55665	1.46789
LRRC70:S420s	-2.52715	1.94112
HDGFL2:S264s	-2.5186	0.947063
DLG1:S684s S687s	-2.4949	1.60942
SEC62:K107k	-2.4819	3.01653
PCP4L1:S9s	-2.4781	1.58908
CCP110:S251s	-2.46485	0.62121
DHCR7:S14s	-2.4562	3.66356
ATP10B:S617s	-2.4427	2.0534
GIGYF2:S684s	-2.43305	1.35712
CYP4X1:S268s	-2.4266	3.02169
C1orf116:S508s	-2.40915	1.18454
FBXL14:S173s	-2.40295	1.63418
ROCK2:K892k	-2.3939	2.26204
PRRC2B:S418s S419s	-2.382	1.67365
TRIM42:S537s M539m	-2.3801	1.26198
UBAP2:T260t	-2.378	2.13818
SLC24A1:T726t	-2.36845	1.27746
NA	-2.35485	2.13773
KMT2B:S894s	-2.3497	1.10142
ZNF185:S64s	-2.29965	1.89265
RASGRF1:S758s	-2.29455	2.05233
MAP7D2:S345s	-2.29075	2.94645
C1orf226:S61s	-2.2883	2.05857
HECW1:S721s	-2.26245	1.25744
MACO1:S244s	-2.25465	4.19298
ITPR3:S1832s	-2.24545	3.30539
NECTIN4:S444s	-2.2233	1.81276
KAT6A:S1113s	-2.205	2.18508
EPN3:S506s	-2.2008	0.9507
HIVEP2:S2425s	-2.18915	1.24566
NA	-2.1875	1.50315
LAD1:S480s	-2.1844	1.37843
ZNF630:K160k M161m	-2.18375	1.91806
GJB1:S258s	-2.1809	1.09788
NA	-2.1657	1.97629
NA	-2.15995	2.49097
ELFN2:S636s	-2.15	2.4503
USP54:S1101s	-2.14085	3.30268
NA	-2.1396	4.47513
NA	-2.135	2.34164
NA	-2.1165	1.81687
EXPH5:S1238s	-2.1128	1.9851
NA	-2.1104	1.93579
SYT17:S110s	-2.108	2.507
NCOA2:S579s	-2.0951	2.97425
AKAP11:S29s	-2.08565	1.47388
PMS1:T8t	-2.08495	4.21382
NA	-2.08365	1.20221
GGNBP2:T137t Y140y	-2.0812	4.77727
C11orf52:S62s	-2.079	4.90239
PRR15L:S73s	-2.0741	3.12665
RTCA:T106t	-2.06595	1.80859
TSPYL5:S227s	-2.05365	1.33689
ABCC3:S844s	-2.05345	1.85186
HNRNPM:S528s	-2.0497	1.98697
KIF1A:S1038s	-2.0338	0.669766
NA	-2.0282	2.33828
EEF2K:Y463y S464s	-2.0246	3.35738
MAGEB3:S70s	-2.02215	2.78529
DDX5:K501k	-2.01775	1.73895
ZNF704:S294s	-2.017	4.68017
NA	-2.0138	2.351
HECW1:S527s	-2.0127	1.03053
KLHL17:S5s	-1.9983	2.66483
MTUS1:T488t	-1.984	1.42726
SYTL2:S199s	-1.97985	2.72499
NA	-1.9742	0.901421
NA	-1.97015	3.8329
SVIL:T1227t	-1.96375	0.287409
HIVEP2:S420s	-1.96065	2.50192
NA	-1.9595	5.31681
NA	-1.9591	2.79748
ARHGEF5:Y1370y	-1.9499	4.79624
ANKRD34B:S502s	-1.9444	2.5202
AK9:S1002s	-1.9443	0.827499
ACTR3:K264k	-1.9323	0.32183
C2CD2:S581s	-1.93225	2.48699
CCSER1:S336s	-1.92615	0.854743
ANK3:S960s	-1.926	3.68346
REEP6:T178t	-1.9252	0.964071
GPAT2:S509s	-1.92205	1.02283
MPRIP:S504s	-1.9145	1.70018
KIAA1671:S1775s	-1.9128	3.09767
KIDINS220:S1747s	-1.91065	2.22009
SGSM3:S406s T409t	-1.91045	1.84593
TRIP4:T327t	-1.9011	2.93401
ZZEF1:T2224t T2226t	-1.8988	1.73159
FGD6:S410s	-1.892	2.57907
LAD1:S385s	-1.89055	1.07723
VPS51:T61t N64n	-1.88935	3.79171
TCEAL4:S251s	-1.88775	1.10925
C2CD2:S511s	-1.886	3.92483
OXNAD1:M1m S9s	-1.8851	2.05617
ZSCAN31:S211s	-1.88335	2.41647
NAALAD2:S507s	-1.8824	2.05233
ACVR1:T203t	-1.8813	2.02824
C4orf19:S46s	-1.8766	0.886486
GRHL1:S25s	-1.87255	0.353686
GRIP1:S381s	-1.8712	0.912279
CARMIL1:T1228t	-1.8682	1.79741
NA	-1.8656	2.54147
ANKFN1:S91s S92s	-1.8628	1.55533
ARFGAP2:S433s	-1.8585	2.61602
NA	-1.85785	2.10445
CSRP1:S81s	-1.85525	1.66325
USP54:S525s	-1.8528	3.59934
NA	-1.8481	3.42231
KRT8:T468t	-1.84475	0.736048
NA	-1.8423	0.467324
ZNF704:K38k K39k	-1.8388	2.43383
ELOA:S373s	-1.83395	2.67431
SRPRA:S142s	-1.8333	2.09088
CHTOP:T33t	-1.8266	3.27453
HTATSF1:S445s S452s S453s	-1.82425	1.71545
SRCIN1:S165s	-1.8192	1.33381
USP54:S26s	-1.81915	3.26048
NA	-1.81545	2.11968
ICOSLG:T20t	-1.8119	0.649827
NA	-1.8099	1.00335
EPN3:T495t S506s	-1.80725	2.63907
FST:S230s	-1.8042	2.37946
SGSM3:S406s	-1.8034	3.79871
GTPBP1:T577t	-1.8024	1.38912
CANX:Q606q S608s T616t	-1.7981	1.98444
SHROOM3:S406s	-1.7958	2.74481
PLCH1:S1551s	-1.79525	1.94071
NA	-1.7899	0.417827
SLTM:S730s	-1.78875	2.53006
GJB1:S233s	-1.78605	1.82002
NA	-1.7848	1.30445
CLDN3:S199s	-1.78355	2.1287
AP3D1:S9s	-1.77855	1.74812
ITPR3:S934s	-1.7771	3.56661
OCLN:S369s	-1.7761	2.01157
AFF4:S703s S706s	-1.7731	2.63427
ABCC3:T887t	-1.7715	1.23639
ITPR3:S1843s	-1.7711	3.89024
RBBP8NL:T638t S645s	-1.7688	1.24477
DENND5A:S441s	-1.76355	1.99599
FERMT2:S351s	-1.7628	2.31404
PLEKHA4:T622t S624s	-1.7608	1.18743
ARHGAP36:T174t	-1.7606	1.5671
RAP1GAP:S516s	-1.7565	2.16343
EEF2K:S18s	-1.7564	4.53734
PPP1R14C:S25s	-1.755	1.2118
TCF20:S825s	-1.7538	1.54058
NA	-1.7534	2.99523
EPB41L4A:S591s S593s	-1.7523	1.17418
MAGI3:S1407s	-1.74515	3.96947
CRABP2:S13s	-1.7451	0.0675046
LYSMD3:S134s	-1.74475	1.89737
UNC13B:S176s	-1.7434	3.05591
CIT:S1385s	-1.74255	2.0551
PLEKHA7:S118s S121s	-1.73995	2.64162
TSC1:S1102s T1110t	-1.7398	1.50853
NA	-1.7393	3.99451
NA	-1.7378	1.81679
NA	-1.7363	0.591067
RBBP8NL:S645s	-1.73525	2.37747
TJP3:S863s	-1.73315	0.825162
FREM3:T118t	-1.72965	0.402669
SH3BP4:S241s	-1.72475	0.39523
RIN3:S697s	-1.7239	1.73263
KIAA0513:S218s	-1.7238	0.97193
HMGA2:S44s	-1.71825	0.846369
NEO1:S1299s	-1.7157	1.17177
TLE3:S311s T312t	-1.7123	2.27021
USP54:S378s S381s T385t	-1.71225	3.74878
GRHL2:T500t	-1.71135	2.94656
MIA2:M1253m S1255s	-1.7095	2.82671
LEMD2:S82s	-1.7092	2.21779
TMEM63C:S77s	-1.70265	1.92508
CAST:Q152q S154s	-1.7008	2.85608
CECR2:S1292s	-1.7006	0.982934
AMOT:S859s	-1.70055	0.999453
LEMD3:S280s	-1.7001	2.92407
SPAG9:S524s	-1.6989	2.03276
RALBP1:K132k	-1.6957	3.28313
VEPH1:S430s	-1.6954	3.86762
RBBP8NL:S262s	-1.694	3.68591
FMN1:S447s	-1.6933	1.91466
NBN:S397s	-1.693	1.73193
BUB1B-PAK6:S347s	-1.6929	3.08648
LRBA:S1052s	-1.69155	1.49654
NEFM:S615s S620s	-1.68965	1.36896
SLC41A3:S13s S27s	-1.6876	1.28001
KIAA1211L:T837t	-1.68705	3.77968
PRPF4B:S87s	-1.6865	0.0992057
SNX29:S268s	-1.68505	3.05331
ANKRD28:S1044s	-1.6836	3.4008
FUBP3:T184t	-1.68325	2.62985
PRKAA1:S501s T505t	-1.68115	1.49511
CTTN:S282s	-1.6811	2.0628
JPH1:S216s	-1.6811	4.01788
OCLN:S370s	-1.6805	1.70958
QARS:S70s S74s S78s	-1.68025	1.03817
NA	-1.6784	2.31557
CORO1A:K461k	-1.678	0.118841
ANK3:S1451s	-1.6745	4.56857
ADGRF1:S867s	-1.6743	0.358147
CAST:S582s	-1.6729	2.10034
OFD1:S735s	-1.67115	3.94064
AHNAK2:S317s	-1.6704	0.00433287
TPD52L1:S154s	-1.6691	2.48286
VPS13B:T3559t S3562s	-1.669	1.71877
ZNF608:T1274t	-1.6675	1.64873
NA	-1.6666	1.63532
WDFY3:S2295s	-1.6648	2.38165
PLIN5:S148s	-1.66415	3.20213
NA	-1.6627	1.86673
CWC25:S170s	-1.662	2.53712
CNST:T294t	-1.6606	4.10024
FAM169A:S399s	-1.66045	1.77189
HERC1:S2874s	-1.6595	2.33777
SHROOM3:S285s	-1.6572	1.86394
ARHGEF19:S197s	-1.6566	3.48928
CARMIL1:S1067s	-1.6565	2.18516
CADPS:S91s	-1.65505	1.30959
PPIP5K1:S1073s	-1.6529	2.19458
NA	-1.6501	1.86557
CLIC6:S322s	-1.6481	1.8403
KCNK5:S266s	-1.64655	2.4044
EPB41L1:S546s T550t	-1.6453	3.59692
ITPR3:S937s	-1.64455	3.92012
NAT1:S77s	-1.6421	3.20732
MAP2:S686s	-1.64155	1.98424
ZRANB2:S188s	-1.6407	1.94385
PPP2R3A:S614s	-1.6405	1.27828
NA	-1.6374	1.68064
EIF5B:S460s	-1.63505	1.5598
MAP7D2:S356s	-1.6337	2.03276
SRCIN1:S1060s	-1.6327	1.12443
PCLO:S826s	-1.6299	3.27321
AGFG2:T163t	-1.6294	1.14507
STK36:S26s	-1.6292	1.60384
VSIG2:S312s	-1.62605	1.58756
ESPN:S342s	-1.626	1.23414
PLEKHF2:S226s	-1.6247	3.89599
KIAA1522:S480s	-1.6201	0.915329
ABCC4:S655s S668s	-1.62	3.13942
BRWD1:S2048s	-1.6189	1.18825
AHNAK2:S1253s	-1.6159	1.06107
ALPL:S394s	-1.6127	1.55488
MLPH:S524s	-1.6105	2.29796
RAP1GAP:S525s	-1.6094	3.39007
AKAP1:S586s	-1.6083	2.50543
C5orf24:S144s	-1.60635	0.996286
CIT:S2013s	-1.6047	1.17509
FOXQ1:S262s	-1.6046	1.03403
SNX25:S639s	-1.60045	2.61909
ERN1:S549s	-1.59925	2.239
TP53BP1:S787s S789s	-1.59665	0.62121
PLEKHA7:S121s T123t S124s	-1.59545	1.55133
CDKN2AIP:S349s T359t	-1.59415	1.89255
NA	-1.5941	3.67832
IRX2:S317s	-1.5921	2.98518
ZMYM4:S162s	-1.59065	1.14728
CLDN3:S199s S203s	-1.5905	2.45282
PKN1:S385s	-1.5898	1.35712
PRAM1:S48s	-1.5881	0.744146
ITGA6:S534s S535s	-1.5864	0.831063
EPB41L3:S92s S93s S94s	-1.5863	1.41623
PDXDC1:T720t S721s S722s	-1.5842	2.57206
FAM13A:S562s	-1.58025	2.12228
TCEAL3:S121s S125s	-1.5788	3.79756
KIF14:S1116s S1124s	-1.5769	1.88246
PRRC2C:S289s	-1.5761	1.95965
HTATSF1:S467s	-1.57595	2.17422
TMEM109:S239s	-1.572	1.9872
EPHX3:S61s	-1.57125	0.560215
FRMPD3:S1389s	-1.57115	1.17924
SLTM:S1001s	-1.5699	1.45007
JPH1:S475s S479s	-1.569	2.88562
TMSB4X:T23t	-1.56765	1.8991
TMEM159:S21s	-1.56385	1.25448
HNF1B:S49s S52s	-1.56355	0.627792
THBS1:K1117k K1130k	-1.5625	1.70845
LGALS8-AS1:T85t	-1.5623	0.812814
PHKA1:S758s	-1.5613	1.50364
SURF2:T190t T195t	-1.56075	1.96698
PRRC2B:S1185s	-1.5603	2.26295
NASP:T464t	-1.5592	2.16619
CNKSR1:S392s	-1.55845	1.93449
NA	-1.55815	1.70673
SHROOM2:T755t	-1.55635	0.485048
NA	-1.5553	1.55379
GLYR1:K144k	-1.5545	1.8421
ARHGAP12:S617s	-1.5524	3.734
CASKIN1:S987s	-1.55185	1.77989
CISD2:T106t	-1.55015	1.48381
PPM1G:K166k	-1.54825	0.760336
TNIK:S541s	-1.5475	1.77506
ARL6IP4:S225s	-1.5449	1.65036
PDE4DIP:S1483s	-1.5445	1.81115
DOCK10:S1226s T1236t	-1.54385	1.88645
STIM2:S634s	-1.5405	2.66546
SPP1:S263s S270s	-1.53945	0.814008
JPT2:S69s	-1.5391	3.18433
RAI14:T13t	-1.539	3.40251
SRCIN1:S64s	-1.5382	3.02474
NAPSA:K391k	-1.5377	1.10429
SETX:S1148s	-1.53575	0.919918
CKAP5:S1861s	-1.5351	2.53223
EIF4G1:S1084s S1099s	-1.53495	1.93728
ATRX:K1274k	-1.5335	2.58934
AUTS2:S872s	-1.5303	0.796855
CECR2:S402s	-1.53	2.0095
PRCC:T261t S267s	-1.52995	2.29331
ABCC4:S668s	-1.5295	1.93449
OXR1:S91s	-1.5278	2.10599
AFDN:S471s	-1.5268	3.10695
TMEM63B:S111s	-1.52615	0.655249
USP47:S868s	-1.5261	0.80803
NSMCE2:S116s	-1.52595	3.49207
FHDC1:S498s S500s	-1.52525	2.38952
BCR:S698s	-1.5247	3.25217
ATP8B4:S728s	-1.5232	1.32361
IQSEC2:S207s	-1.5223	2.99523
SLC35F5:S208s	-1.522	2.45891
NA	-1.5207	1.34693
NA	-1.5206	3.26267
MKI67:T2389t	-1.5205	0.18006
FOXA2:T303t S315s	-1.5177	3.19432
NA	-1.5175	3.17913
TMEM87A:S115s	-1.51495	1.18045
GRAMD2B:S84s	-1.5141	0.618921
NA	-1.5134	0.347492
MAP3K1:S1026s	-1.51295	1.95105
LEMD2:S499s S501s	-1.5128	1.25526
RANBP2:T2005t S2008s	-1.5124	3.71712
SYNE2:S6349s	-1.51	5.53547
LIME1:S166s S168s	-1.5076	0.641075
CHD2:S1799s S1801s S1807s	-1.5058	1.41809
KIAA1211L:S57s	-1.5045	2.12237
ARFGAP3:S429s	-1.5037	1.90939
RREB1:S1238s	-1.50325	3.61798
MOK:T291t	-1.5028	2.76651
PTPN13:T1583t	-1.5001	2.17125
CEP170B:T537t	-1.4999	2.66086
DAPK1:S319s	-1.4976	2.31009
VPS50:S595s	-1.4956	2.07121
CIC:S2253s	-1.4945	2.58981
IGSF10:M927m K929k K934k	-1.4939	1.41118
MLPH:S435s	-1.49245	1.4505
CHAF1B:S458s	-1.4923	1.36785
SNW1:S14s	-1.4917	1.8074
RAB11FIP4:S425s	-1.4915	3.22846
PCLO:S906s	-1.49015	3.66187
VIPAS39:T21t	-1.49	1.92627
ANK3:S873s	-1.4899	1.94514
GLCCI1:S145s S148s	-1.48905	1.71307
NKX2-1:S34s	-1.4885	0.359281
ERICH3:S190s	-1.488	0.941374
NA	-1.4845	1.74721
PPP1R9A:S1140s	-1.48425	3.16214
EEF2K:S464s	-1.4835	2.6431
FAM133B:S82s	-1.48255	1.52489
MAP1B:S1782s S1785s T1788t	-1.4799	1.24354
CD34:N362n N371n S374s	-1.4794	1.02176
VPS13C:S3484s	-1.4776	1.83855
NA	-1.4737	2.91279
CERS4:S342s S349s S350s	-1.4733	2.4658
LMO7:S544s	-1.4723	1.7729
AKAP6:S1335s	-1.4711	2.58084
FNBP1:S497s T507t T523t	-1.47095	1.61099
NBN:S347s	-1.4707	2.10333
RALGAPA1:S711s	-1.46935	2.5743
KIAA1210:S1441s	-1.4687	1.95102
DCLK1:S332s S334s S337s	-1.4687	3.23508
MUC21:S573s	-1.4683	0.322845
YAP1:S138s	-1.46615	2.08598
BCAP31:S283s	-1.4659	2.00223
USP54:S399s	-1.4646	2.41624
CIT:S2035s	-1.4637	0.496332
C1orf226:S241s	-1.4627	2.49543
SLC4A4:S223s	-1.459	1.05818
MDC1:S376s T378t	-1.4576	3.34429
PLD1:S540s	-1.456	2.58368
ABLIM1:S217s	-1.4558	1.41551
APBA1:M281m S282s S285s	-1.4551	2.93053
NA	-1.4546	2.34785
CABLES1:S242s	-1.45425	2.07696
BET1:S50s	-1.4536	2.19155
NCL:S580s	-1.45225	4.01142
FNIP2:S713s	-1.4514	2.48612
C1orf87:T65t T77t	-1.4513	0.342897
SIDT1:S184s	-1.4498	0.354443
RAP1GAP:S521s	-1.4492	2.89216
PHKB:S677s	-1.4487	1.82813
PPP1R9A:S187s S190s	-1.44855	2.64172
DMRTA2:S208s	-1.44825	2.5325
NA	-1.4478	0.164961
NA	-1.44775	0.592834
ID4:S5s	-1.4475	3.43846
PKN1:S380s	-1.44725	0.187315
PYGO1:S34s	-1.4472	2.56
NA	-1.4425	1.80122
MAST4:S1293s	-1.4419	2.01664
LPP:Y317y	-1.4413	2.01726
OSBPL6:S290s	-1.4391	5.19749
ALKBH5:S379s	-1.4388	1.30052
KIAA0319L:T974t	-1.4388	3.47121
NHSL2:S908s	-1.43865	2.67282
CLASRP:S335s	-1.43715	2.37027
STK33:S87s	-1.4343	1.91973
MLPH:S526s	-1.4323	1.05979
ZBTB18:S526s	-1.43185	2.68119
KIAA1217:S1668s	-1.43085	1.87693
DOP1B:S681s	-1.4304	4.36464
TRAF3IP2:M1m S7s	-1.4301	0.458708
HEATR1:K2094k	-1.42905	2.85874
UBE2O:S515s	-1.428	2.70075
WDR70:S638s	-1.4279	3.08648
MAP1B:S582s	-1.4275	1.13873
IQSEC2:S230s	-1.4269	2.71661
NA	-1.4268	2.23686
SRRT:K324k	-1.4248	0.686528
KIAA1217:S1739s	-1.4241	0.928469
KDF1:S158s	-1.42335	3.2023
NEFL:S472s	-1.4229	1.94684
KIDINS220:S1645s	-1.42045	0.470019
PTPN13:S1226s	-1.41965	2.56044
DYRK1A:T466t	-1.4188	1.14033
FRA10AC1:M1m S9s S12s	-1.4173	1.11968
GPRIN2:S268s	-1.4173	1.84824
EPB41L1:S784s	-1.4172	2.27167
DNAJC30:S39s	-1.4169	3.14108
MED1:S1252s	-1.4165	1.24591
ING4:K114k	-1.41505	0.809931
SETD2:S544s	-1.4136	0.395248
NA	-1.413	0.981533
ABCC3:S908s S911s	-1.4116	1.82461
OXR1:S204s	-1.4112	1.17379
ANK3:S1797s	-1.41085	4.58968
LIMK2:K378k	-1.4088	1.83497
ARHGEF5:S57s	-1.40795	3.80186
JPT2:S97s	-1.4079	1.16879
EPS15:T663t	-1.40775	2.37721
CCSER1:T132t	-1.407	1.85646
KIF13A:S1529s	-1.4062	2.8267
SYT17:S119s	-1.4055	2.454
JPT2:S144s	-1.4053	1.84307
RALGAPA1:S342s	-1.4053	1.88447
C2CD3:T83t	-1.4053	2.16524
OFD1:S808s S811s	-1.4052	1.48585
LEMD2:S499s	-1.40505	2.20745
C1orf116:S133s	-1.405	2.04528
BRPF3:S928s	-1.4045	2.53742
TCEAL4:S156s	-1.4043	2.75727
NRK:K46k	-1.404	1.74747
AJUBA:S79s	-1.404	3.44389
SORBS1:T27t	-1.4036	1.35881
TBC1D5:S752s	-1.40305	3.80737
MBP:S40s N55n S59s	-1.4027	0.84239
IRX5:S464s	-1.40265	1.61404
TLE3:T312t	-1.4024	2.20703
NPM1:S139s	-1.40195	0.130754
CELSR1:S2968s	-1.4018	3.16006
SEC22B:S137s	-1.4003	2.63482
LYN:Y397y	-1.3997	1.57698
LPIN2:S186s S187s	-1.3979	1.73957
SAMSN1:Y104y S107s	-1.39695	1.95144
PBX3:T191t M202m	-1.3954	1.95209
PIGR:S734s M741m	-1.3943	1.12516
SRSF11:S207s S212s	-1.3941	0.778524
PRR15L:S102s	-1.3926	3.08364
TPPP:S159s	-1.3921	2.15953
ERCC6:T1220t	-1.3916	0.322291
NCOR2:T1436t	-1.3914	4.22807
TEX2:S295s	-1.3906	2.93518
LCA5:S87s	-1.3896	1.05618
PRAG1:T1227t	-1.38905	1.13212
NA	-1.389	2.77809
RHBDF1:S92s	-1.389	0.633364
EIF4G1:S1201s	-1.3888	2.09532
BCL11A:S625s	-1.38675	2.00493
EEF2K:S474s S477s S478s	-1.386	1.52187
ZNF704:S77s	-1.3808	3.19672
DCLK1:S330s S332s	-1.37955	2.72836
TSC2:S1348s	-1.37935	3.07869
SLC2A13:S6s	-1.37905	1.64359
MAST3:S747s	-1.37755	0.711072
TIAM1:S1437s	-1.3775	3.44088
DTNA:S563s	-1.37675	3.33862
NA	-1.3767	1.40885
ARFGEF3:S2081s	-1.3761	4.32136
SLPI:K71k	-1.37525	1.0545
RPS6KA3:T231t	-1.37495	2.25097
TANC2:S1476s	-1.374	0.606649
TTI1:S1029s M1035m	-1.37335	1.60367
MACC1:S515s	-1.373	0.0209916
LPIN3:S412s	-1.3726	2.87505
EXPH5:S124s	-1.3722	2.2562
ABCC4:S655s	-1.3721	3.70833
POLR3C:S46s	-1.3715	1.55907
NA	-1.37135	2.48741
MARVELD2:S407s	-1.3707	2.38799
DENND5A:S834s S836s	-1.3702	1.13138
ATP2B1:S1155s T1165t	-1.3701	3.43135
NA	-1.3689	1.86394
TCEA3:S115s	-1.3687	1.56103
SURF2:S234s	-1.36785	0.0185607
STOML1:S22s	-1.36755	2.51659
CD44:N685n S686s N688n S697s	-1.36725	1.66202
EPB41:S85s	-1.36665	0.205076
MYO9A:S1223s	-1.3661	2.97123
TCEA3:S130s	-1.3659	1.08666
PARG:S68s	-1.3658	1.56832
SNX19:S737s	-1.3654	3.02817
MYO1D:S493s	-1.3651	0.566689
THADA:S1015s	-1.3638	3.31037
LRCH3:S352s	-1.3637	0.991709
TMCC1:S382s S392s	-1.3633	3.79913
NA	-1.3629	1.29122
DNM1L:S542s	-1.3626	2.8977
PTPN12:S449s	-1.3625	2.61375
BICDL2:S349s	-1.3619	2.64425
DTNB:S394s	-1.3619	3.17332
NA	-1.361	2.58793
ABCF1:S166s	-1.3609	4.57331
NA	-1.3601	3.03561
PHKA2:S729s S735s	-1.36	0.837097
CUL4A:S10s	-1.36	3.25217
LRCH4:S432s	-1.3597	2.80235
MAP2:S217s	-1.3592	0.788564
CLEC16A:S863s	-1.3574	2.47109
PDXDC1:S718s	-1.3561	2.27345
NBEAL1:S1299s	-1.35595	1.50884
POR:S71s	-1.3558	1.60481
MYO9A:S1416s	-1.3557	1.92624
C1orf116:S281s	-1.3555	4.51053
EEF2K:S470s S474s	-1.3549	5.0499
ANKRD18A:M1m S6s	-1.3544	0.747758
ZNF219:S114s	-1.3543	2.18748
MYO18A:S132s	-1.35375	2.82029
CYBA:S168s	-1.3532	0.232622
TRERF1:K666k	-1.35295	1.63582
HNF1B:S49s N67n	-1.3529	1.33781
KLHDC7A:S365s	-1.352	4.63759
NA	-1.3513	4.00619
GRHL2:S232s	-1.35085	1.60657
SPAG17:K2101k K2111k	-1.3506	2.30813
CCDC88C:S1496s	-1.3499	1.13302
NA	-1.3498	1.59012
R3HDM2:S921s	-1.3491	2.67003
VPS13D:S2093s	-1.34755	1.43897
PKDREJ:S135s	-1.3475	3.70351
SEPT9:S6s	-1.34595	0.262542
FIG4:S630s	-1.34585	2.12064
AGAP3:S152s	-1.3443	1.56295
TLK2:S26s	-1.34395	1.42065
MTUS1:T1204t	-1.3437	1.44731
TANC2:S1968s	-1.34355	1.79508
TMEM131:S1179s	-1.34225	2.4126
ASB16:T112t T119t	-1.34205	1.76615
CAMKK1:S109s	-1.34195	2.45278
TCEAL3:S125s	-1.34195	2.75416
GTF2A1:S316s S321s	-1.3414	0.681338
LILRB4:S417s	-1.34055	0.0470653
ERBB3:S982s	-1.3395	2.03371
PHIP:K1736k	-1.3393	1.86317
LUC7L3:S367s	-1.33875	0.180251
TKT:K254k	-1.33845	2.73114
MYRIP:S638s	-1.33795	2.25712
PTPN13:S240s	-1.3367	2.55469
IRX2:S252s	-1.334	2.61771
RAP1GAP:S548s	-1.3339	1.10058
ST5:Y501y	-1.3332	2.22981
PTPN13:S890s	-1.3331	1.79782
ERBIN:S1015s	-1.3323	2.09404
NA	-1.3298	1.2977
NAV2:S860s	-1.328	2.43363
CABLES1:S373s	-1.3271	3.10006
DIS3L2:S194s	-1.32695	2.21068
KANSL3:S511s S515s	-1.3268	1.97273
RFX5:S605s	-1.32595	4.35401
MIA3:S1908s	-1.32555	3.72705
PPFIBP2:S387s S389s	-1.3251	3.67472
COBLL1:S998s	-1.325	2.32749
CRLF1:S127s Y130y	-1.3248	2.26091
NT5C2:S535s	-1.32405	1.60139
MTMR3:S288s N298n	-1.32285	1.83985
EPB41:S664s	-1.3226	3.73647
IKBKG:S320s	-1.32175	1.29639
MGA:S2190s	-1.32145	1.67364
GRAMD2B:S87s	-1.3212	3.69711
VAPB:T150t	-1.321	2.30237
ACIN1:S825s	-1.32	3.10695
COBL:S962s	-1.3198	3.37342
FAM169A:S449s	-1.3191	2.21956
TJP3:S221s	-1.3176	1.20198
NA	-1.3171	2.86591
NA	-1.316	2.21505
KIAA1522:S197s	-1.31555	1.70067
CDC5L:S303s	-1.31555	2.91344
PHKA2:S729s	-1.3155	4.01788
ABCC3:S864s	-1.31505	0.880114
SPATA7:S194s	-1.31485	1.50266
NA	-1.3147	1.61211
CIAO1:C243c S248s	-1.3141	0.412587
PHF3:S680s	-1.3133	2.15218
LUC7L3:T238t	-1.3128	2.15771
CD44:N700n S704s S706s	-1.3125	1.64167
TRIP11:S1859s	-1.31205	2.02564
CHD7:T2472t	-1.3114	0.283899
MAP7:S290s	-1.3111	1.53087
DMXL2:S451s	-1.3108	2.36702
NA	-1.3106	1.60714
PARD3B:T695t	-1.30865	1.25439
C1orf116:S39s Y40y	-1.3083	0.458708
AKR1C1:T82t	-1.3065	0.377037
LAD1:S347s	-1.3062	1.34797
RAP1GAP:S441s	-1.3051	3.56384
NA	-1.3049	1.43339
LAD1:S485s	-1.30415	1.87118
MTMR12:S703s	-1.3036	1.843
CFI:S90s	-1.30305	0.855749
ARFGEF3:S597s	-1.3017	3.71917
FAM114A2:S87s	-1.3016	1.34496
ENSA:S125s	-1.2998	2.61449
RANBP2:S1955s	-1.2997	2.97248
NA	-1.2986	1.5322
NT5C2:T518t	-1.2986	2.13411
GLOD5:K79k	-1.2985	3.27396
NA	-1.2984	2.38669
MTUS1:S1224s	-1.298	2.04198
BBX:S178s S183s	-1.2974	1.11699
CTNND1:S847s	-1.2969	4.12391
NSD1:S483s S486s	-1.29675	4.3933
MIGA1:S131s	-1.2967	1.10376
TMEM201:S466s	-1.29665	4.04305
NA	-1.2961	1.66401
NA	-1.2959	0.267061
RIPOR1:S40s	-1.29585	1.80426
PRDM16:S549s	-1.2958	1.93579
KIF13A:S434s	-1.2944	1.34467
RAC1:T154t Y158y M164m	-1.2943	1.58682
ARFGEF3:S1635s	-1.2922	2.3867
PIGR:S682s S684s	-1.2921	1.71163
RAI1:T1297t	-1.29125	2.71127
NA	-1.2906	0.99623
NA	-1.2887	2.009
CWC15:T47t	-1.2877	1.44322
CROCC:S1619s	-1.2873	2.56309
PTPRQ:S687s	-1.2871	0.936223
MBD1:S490s	-1.28705	2.58965
CDC42EP4:S64s	-1.2863	1.78994
SUN2:T33t	-1.28615	1.10856
GAB1:S419s	-1.28535	2.96747
RBL2:T401t	-1.2852	3.64636
RIMS3:S24s	-1.28305	3.03892
MADD:T1066t	-1.28295	1.1662
PPL:S341s	-1.2828	0.690887
ARHGAP32:S892s	-1.2813	0.438196
HNRNPUL1:M12m T16t	-1.28065	1.49725
NA	-1.2799	1.25192
ARFGEF1:S1079s	-1.279	4.79008
USP24:S1299s	-1.2788	1.33881
SASH1:S743s	-1.2782	2.19766
PITPNM3:S907s	-1.2774	2.4317
RHBDF1:S8s	-1.27695	2.9026
NA	-1.27675	0.417883
NMI:S16s	-1.2766	0.696208
MAST4:S23s	-1.2751	4.12784
DDHD2:S447s	-1.2749	2.07204
KIF16B:S1017s	-1.2742	2.65949
MAST4:S137s	-1.2742	2.70503
USP28:K416k K420k	-1.27365	0.555145
NA	-1.2735	0.989533
TXLNG:S69s	-1.2733	2.14766
NA	-1.2722	1.70158
EAF1:S21s	-1.27105	1.20899
KANK1:S186s	-1.2708	1.96791
NEDD1:S404s	-1.2703	3.59491
NA	-1.2698	1.49654
MIS18A:S36s	-1.2696	2.46382
DMXL2:S2400s	-1.2679	3.03562
SCRIB:S1378s	-1.2677	3.16877
IFI16:S512s	-1.2671	1.14378
BCL2L14:S44s	-1.2666	1.1067
NA	-1.2663	4.07661
UIMC1:S402s	-1.2648	2.37164
NA	-1.2643	0.820192
EGFR:Y1197y	-1.26425	2.61232
AKAP1:S592s	-1.2636	2.86723
MAPT:S411s	-1.2635	0.258446
TGS1:S141s	-1.2635	1.40435
SHE:S259s	-1.26305	1.18031
KIF26B:S553s	-1.2625	3.32679
COBL:S988s	-1.26245	1.60367
TTC38:S240s	-1.2616	1.31401
PPP1R12A:S527s	-1.26055	1.06854
NA	-1.2604	2.12561
MAP2:S862s	-1.26	1.79721
NA	-1.25975	1.04036
NA	-1.2597	2.60664
NHS:S1062s	-1.25895	0.865387
EGFR:S1166s	-1.2584	2.74912
DACT1:K610k	-1.2583	0.311382
KIF4A:S1038s	-1.2581	0.558783
NA	-1.2579	1.11284
PPP1R13B:S566s	-1.2579	0.713558
MAPK1:S360s	-1.25745	1.54924
NA	-1.2568	1.63425
CA1:K160k	-1.25665	2.34728
NA	-1.2564	1.22009
NA	-1.2558	3.94798
RBM15:S765s	-1.25455	1.2441
ITPKB:S86s	-1.2533	4.65409
NA	-1.2529	1.16879
WWC3:S907s	-1.2522	2.47293
SH2D4A:S275s	-1.252	0.979104
NA	-1.25135	1.14888
ATF2:S90s	-1.251	1.87199
MACO1:S305s	-1.24965	3.4034
WDR91:S288s	-1.2494	1.41623
TRIM2:T93t	-1.24925	1.35571
SLC4A4:S68s	-1.24865	0.169155
ICA1:S324s	-1.2482	0.51171
SHC3:S324s	-1.2464	2.14852
CDK13:T1056t	-1.24635	3.22064
EEF2K:S445s	-1.2441	4.79008
MBD4:S415s	-1.244	0.978736
SDC3:Y441y	-1.2433	1.39607
ARHGAP22:S447s	-1.24255	0.52987
ALYREF:S15s	-1.2422	0.998974
EVI2B:S268s	-1.2421	2.36422
PHACTR4:S565s	-1.2407	3.39294
NA	-1.24	2.21093
SYTL3:S185s	-1.2389	4.17149
WWC1:S848s	-1.2385	0.592834
CCNL2:S330s	-1.2378	2.40361
SHE:S341s	-1.2378	2.63482
ZNF704:S225s S228s	-1.23755	3.58772
EXPH5:S688s	-1.2364	1.84909
BLM:S48s	-1.2362	1.33092
CEP68:S25s	-1.2361	1.3688
BIRC6:S3578s	-1.236	2.35106
MAST4:S206s S213s	-1.23455	2.46211
PPL:S887s	-1.23435	1.46138
TCOF1:Q1208q S1220s	-1.2343	3.59692
SF3B1:S129s T142t	-1.23315	1.77048
ACIN1:S825s	-1.2326	3.17913
ANK3:S1720s	-1.2325	3.98285
GAK:T908t	-1.23245	1.96352
DBNL:T299t	-1.2318	2.7299
NA	-1.2305	2.37774
ZRANB2:S181s	-1.2304	0.936584
EPS8L2:T184t	-1.2301	1.31165
FOXP4:S86s	-1.23	2.83257
NA	-1.2296	1.50364
FAM129A:S577s S581s S582s	-1.2293	2.3894
NA	-1.2283	4.24341
SYDE2:S622s	-1.2278	4.39541
LIMA1:S709s	-1.2276	1.87957
BAIAP2:S511s	-1.2275	1.61379
TRIM13:S174s	-1.22725	2.53146
ARHGEF7:S717s	-1.227	2.88561
MST1R:S1056s	-1.2265	0.898377
ZNF471:T419t	-1.2261	1.13982
ALG9:S16s	-1.2261	2.91743
ARFGEF3:S471s	-1.226	2.88561
ADCY9:S611s	-1.226	3.86171
CHD3:S132s S138s	-1.22555	1.40529
PLEKHG1:S1179s	-1.2253	1.79549
RABGAP1:S501s S508s	-1.22395	1.48631
GRSF1:S335s	-1.223	0.415773
PLIN5:S140s	-1.2229	2.31351
NA	-1.2225	0.793708
EPB41L1:S639s	-1.2223	3.73082
ZNF768:S139s S144s	-1.22225	1.74793
SSH1:S576s	-1.2217	1.95769
NCOR1:S88s	-1.22165	3.51948
LMO7:S417s	-1.2216	1.83245
HMGA1:T78t	-1.22105	0.311747
RMDN3:S373s	-1.22075	1.33649
CAMKK1:S79s	-1.2203	1.69851
CDK18:S98s	-1.2203	2.19373
CDC42EP4:S344s	-1.2195	1.21116
SMARCAD1:S79s	-1.2194	1.67149
COL4A3BP:S373s	-1.2173	1.14376
YAP1:S363s	-1.2172	1.78589
ZNF608:S782s	-1.21695	2.89658
MUL1:S297s	-1.21675	0.745373
TCEAL4:S245s	-1.2167	5.18824
NIPBL:T2667t S2672s	-1.2166	2.99163
PLEKHA7:T123t	-1.2155	1.20044
RAPGEF2:S1139s	-1.21545	2.03037
ACIN1:S828s	-1.2151	1.81976
BNIPL:S88s	-1.21495	0.916603
PPFIBP2:S331s	-1.2144	3.06608
ZCCHC17:S136s	-1.2137	3.46555
ANK3:S1840s	-1.2133	2.83707
NA	-1.2124	3.15842
TBC1D4:S673s S678s	-1.2119	1.09253
TMCC2:T466t	-1.2118	3.41943
ACOXL:M1m T5t	-1.21155	0.865387
AFF4:S694s	-1.2112	1.77026
EIF4B:S283s	-1.2107	0.55602
ARHGEF19:S338s	-1.2088	3.22474
PPM1J:S76s	-1.20835	3.48615
PPP1R2:T22t	-1.2082	2.75992
PALM3:S420s	-1.20795	2.4936
PTMS:N43n T52t	-1.2075	0.318837
C9orf152:S88s S90s	-1.2071	1.49877
TP53BP1:S1623s	-1.2063	1.2903
MPLKIP:T120t	-1.20565	1.85592
PTK2:S840s	-1.2053	2.55072
TMEM94:S811s	-1.20505	2.90281
CMTM4:T208t	-1.20395	1.66701
NA	-1.2037	2.20232
MAST2:S862s	-1.2037	0.434183
ZNF608:S1270s	-1.2031	3.78101
DOCK10:S1286s S1289s	-1.2029	2.64425
ZNF219:S592s	-1.20275	1.38817
KIAA1211L:S881s	-1.2011	1.97629
COBLL1:S344s S356s	-1.20105	2.46971
MAN1B1:S17s	-1.2009	2.9456
GRIP1:S901s	-1.2003	0.97197
SPATS2L:S189s	-1.1983	1.84816
MLPH:T228t S231s	-1.19725	0.284929
ZC3H12C:S612s	-1.1968	2.27167
NRSN2:S178s	-1.1968	2.8754
USP54:S1106s	-1.19585	1.31682
FNIP1:S99s S103s	-1.1958	3.06191
EVA1A:S114s	-1.19565	3.45589
SLC9A1:S703s	-1.1955	2.05857
NA	-1.1937	1.39203
PIGR:S275s	-1.1936	1.86394
TBC1D14:Q248q S249s	-1.1925	1.76694
ANKRD34B:S432s	-1.19245	2.21172
SLC19A1:S225s	-1.192	0.943925
REPS2:S260s	-1.19105	0.842417
NFATC2:S363s	-1.1909	3.78735
IQGAP2:S16s	-1.1906	1.70158
ZNF276:S357s S360s S366s	-1.1906	2.041
HEATR6:S337s	-1.1897	1.44915
NA	-1.1882	0.788567
KIAA1211:T1174t	-1.1882	0.609375
BIVM-ERCC5:S610s S611s	-1.1877	3.14809
DCLK1:T311t S312s S313s N315n	-1.18755	1.31255
HSF1:S136s	-1.1874	1.56375
BUB1B-PAK6:S347s S351s	-1.18645	3.25898
NA	-1.18585	2.97934
WASHC2A:S996s	-1.1851	2.61375
R3HDM2:S347s	-1.18445	1.62383
KIAA1324:S942s	-1.18395	1.08991
PPP2R5C:S552s	-1.1839	2.5046
R3HDM2:S37s	-1.1835	2.09821
PAK1:K63k K66k	-1.1834	2.03323
AHSA1:N169n S172s	-1.1832	2.18327
WNK1:S2632s	-1.18295	3.49995
LMO7:T117t	-1.1823	1.94385
RPL11:S51s	-1.18205	0.724615
GORASP2:T204t	-1.1817	3.17872
DUOX1:S634s	-1.18105	1.47767
SEPT9:S22s	-1.181	2.10034
ARHGEF38:S582s	-1.1806	0.871944
NUMB:S276s	-1.1799	0.545233
BAG3:S275s S279s	-1.1798	2.02498
NA	-1.1791	0.601416
NA	-1.1786	2.60664
HMGCR:S504s	-1.1774	1.22774
MYO9B:S1430s	-1.17715	3.44149
WDFY3:S3335s S3339s	-1.1771	1.95207
MLPH:S536s	-1.17685	1.77048
FAM83H:S785s	-1.1758	0.975749
TJP3:S378s S380s	-1.1756	1.76262
ADAM9:S799s	-1.1756	2.77809
NEXN:S428s	-1.17475	1.13444
MAP1A:S460s	-1.17435	1.72385
NA	-1.1739	3.08648
CDC37:T118t	-1.1739	2.05028
SYT17:S118s S119s	-1.1736	1.39445
INTS10:M380m S381s S382s	-1.173	2.38147
EIF4G1:S1084s	-1.17285	2.23301
LZTS3:S458s	-1.17275	2.1688
KIAA0319L:T974t S978s	-1.1726	2.74097
RAPH1:S41s	-1.17225	2.7356
C2CD2:S435s	-1.172	2.90891
MAP2:T522t	-1.17185	1.13439
ZFHX3:S2226s S2230s	-1.1718	2.36073
NA	-1.1717	4.20736
EMD:S141s S142s S143s	-1.1713	2.23442
PLLP:S9s	-1.1709	1.81988
NEK11:S429s	-1.1706	2.34639
MAST4:S914s	-1.17045	0.452138
JPH1:T461t S465s	-1.1704	3.3851
HMGN1:K5k	-1.1702	2.15743
NA	-1.1699	3.39901
MTDH:S415s S426s	-1.16945	0.584583
FABP5:K103k	-1.16935	1.07579
VPS13D:S1038s	-1.169	1.17359
DOCK10:S1251s	-1.1689	2.48628
NA	-1.1686	2.41365
NEK1:S414s	-1.16835	1.81002
PFKL:S825s	-1.1681	1.77245
NAPB:K302k	-1.1679	1.8751
HECTD1:S1567s	-1.1678	4.40939
KIAA1211L:S45s	-1.1674	1.51142
PHTF1:S254s	-1.16735	1.52996
VAPB:S146s	-1.1669	5.01337
EXOC5:S378s	-1.16665	1.32166
NA	-1.1662	1.32442
CIRBP:T17t	-1.1649	2.58547
PREX1:S436s	-1.1647	1.40009
VEPH1:S509s	-1.1644	3.56613
TANK:S82s	-1.1639	1.87557
ATG4C:S160s	-1.1639	3.4297
NA	-1.16385	2.87666
ARHGAP44:S596s	-1.16385	2.55332
SALL2:S222s	-1.1635	1.60476
LARP1B:T616t	-1.16315	1.16441
MTSS1L:T643t S673s	-1.16275	1.27835
TRAPPC9:T23t	-1.1627	0.764144
TMCC2:S126s	-1.1627	0.868581
SORBS1:S731s S735s	-1.16255	1.14717
ZC3HC1:S24s T28t	-1.1625	0.563835
PLEKHA6:S459s	-1.1617	0.863378
NA	-1.1616	2.58793
KAT6B:S1048s	-1.16075	1.97226
C7orf57:S250s	-1.1606	0.970974
GON7:S92s	-1.1606	3.51978
MAP2:S833s	-1.1606	1.51075
OFD1:S899s	-1.16055	3.5479
KIAA1217:T166t	-1.16015	2.32487
MCM9:S942s T946t	-1.15865	1.59608
NA	-1.158	0.99034
NA	-1.1578	2.71075
MEI1:S865s T868t	-1.15755	1.12613
MTOR:T1262t	-1.15745	2.36727
DENND5A:T833t	-1.1565	1.68854
ARFGEF1:S667s T686t	-1.1562	3.49907
MAGI3:S1255s S1257s	-1.1553	2.24475
RBM41:S6s	-1.15515	1.26219
RAB11FIP1:S500s S501s	-1.155	1.1886
COL19A1:S81s	-1.1549	1.29142
NA	-1.15475	0.84064
C1orf116:S496s	-1.15465	1.67553
PLEKHG1:T888t	-1.1545	1.65363
FAM169A:T448t S449s	-1.1543	1.73408
SLTM:S572s	-1.15365	1.54654
NA	-1.1533	5.38465
NA	-1.1532	0.554533
RASD1:S210s	-1.15315	0.405369
DLG5:S1666s	-1.15315	3.03933
CLINT1:S459s	-1.1528	3.43846
PCF11:T459t	-1.1527	4.28401
CCP110:S384s	-1.1527	3.18254
PPL:K786k	-1.1525	1.53517
NA	-1.1523	0.326972
NA	-1.1523	1.25192
LPIN2:S151s	-1.1522	1.06597
FOXO3:T32t	-1.1521	2.34741
DSN1:S30s	-1.1512	0.831063
ARPP19:T113t	-1.151	1.59743
NA	-1.1509	1.23692
PTPN13:S936s S938s	-1.1508	2.27103
NSD2:Q300q K309k	-1.1506	1.2756
SNX2:S119s	-1.1504	1.35802
BCR:S473s	-1.1503	3.45866
SENP2:S344s	-1.1501	5.18247
NA	-1.1499	2.54147
DHX57:S127s S132s	-1.1492	1.4298
EDC4:S871s S879s	-1.1492	2.50492
ZBTB21:S411s	-1.1487	4.36458
LIMA1:S726s	-1.148	3.31545
WWC1:S834s	-1.14765	1.19287
LIMA1:S228s	-1.1476	2.91148
RAPH1:S845s	-1.1475	1.32442
PUS7:S39s	-1.1468	2.28348
PTPN11:Y546y	-1.1465	2.4317
MUM1L1:S241s	-1.1463	1.62882
IRF2:S339s	-1.1459	3.04322
NFIX:S399s	-1.14585	1.50077
GPRC5C:S476s	-1.1454	1.29813
NA	-1.14535	2.63711
PRDX2:S112s	-1.14515	1.84143
FBXO42:T467t	-1.145	2.58934
PLEKHA5:S494s	-1.1444	2.19887
PLD5:S187s	-1.14365	0.745714
SRRM2:S322s S323s S333s	-1.1427	1.06652
AFAP1L2:T516t	-1.1423	1.02421
NA	-1.1421	4.5748
LARP4:S624s	-1.14095	1.16318
SEC22B:S168s	-1.1408	2.79401
SMG1:S34s	-1.1404	2.79144
RRAGC:S15s	-1.14	2.89549
PLXNB2:S1731s	-1.1391	0.770789
EI24:S320s	-1.1391	2.94515
HLCS:S226s	-1.13905	2.37222
NA	-1.1385	0.9357
JPH1:S475s	-1.1385	1.21269
PNMA8A:S428s	-1.13845	0.821475
WNK1:S2271s S2272s	-1.1384	3.43352
ZCCHC8:T479t T485t	-1.13785	1.65657
ESYT3:S697s	-1.1374	3.16877
ST6GALNAC1:S393s	-1.13705	1.1135
NA	-1.137	1.35667
HUWE1:S3802s	-1.13685	1.53664
NA	-1.1366	2.65655
TBC1D30:S637s	-1.1363	0.907939
SLC39A11:S125s	-1.13615	1.36233
NR3C2:S129s	-1.1361	2.09559
TRAFD1:S491s	-1.13605	2.73859
LANCL1:K52k	-1.1356	0.874015
MAST4:S156s	-1.1354	2.96332
NA	-1.1351	2.16806
ARFGEF3:S2097s	-1.1348	2.71075
LMO7:S300s	-1.1347	1.48239
WWC1:S523s S525s	-1.13405	2.43084
ARID4B:S790s T793t	-1.133	1.13871
UVSSA:K339k	-1.1329	1.01542
SLC20A1:S277s	-1.13285	4.13692
HPS4:S373s	-1.1318	3.37936
BCL2L13:S375s	-1.13135	0.760082
UBR3:S1053s	-1.1312	3.41266
TSC2:S1342s S1348s	-1.1306	2.08656
JPH1:S216s S220s	-1.1306	1.55869
ISOC1:K273k	-1.13025	1.09153
NA	-1.1296	0.9357
TEX264:S239s	-1.1296	1.49412
PTPN12:S412s	-1.1292	1.60604
NA	-1.1291	0.956216
PCBP2:S272s	-1.12865	1.7578
TACC2:S317s	-1.12855	0.913628
TOP1:Y125y	-1.1285	1.0848
NFIX:S301s	-1.1277	3.82149
HSP90AB1:S452s	-1.1276	0.876786
NA	-1.127	2.55072
NA	-1.127	3.61354
POMT2:S41s	-1.12675	2.00191
TMX1:S270s	-1.1264	3.28373
IRX2:S445s	-1.1256	2.75063
R3HDM2:T363t	-1.12555	2.69525
NA	-1.1254	3.04069
GRHL2:S81s	-1.1247	0.761483
ARHGAP35:S1150s	-1.1242	2.44075
ARHGAP35:S1001s	-1.12415	2.77917
ZNF362:T162t	-1.12405	3.12152
NA	-1.1233	2.96513
PATJ:S1372s	-1.12295	2.17852
USP6NL:S422s	-1.12285	0.587214
ALG3:S13s	-1.1228	1.92905
SCAMP3:S32s	-1.1227	4.72469
ARHGAP21:S612s	-1.1221	1.64733
MTMR12:S716s	-1.1221	3.07627
FBLN1:S247s	-1.1217	0.811631
GAB1:S547s	-1.1213	4.18643
CLIC6:S377s	-1.1211	1.85999
RIN2:S534s S535s	-1.1206	1.57899
WAC:T457t	-1.1206	3.77036
NCOA2:T854t	-1.12035	0.776305
UTP6:K128k	-1.1197	0.679415
CACNA2D2:S287s	-1.1196	0.327214
REPS2:S254s	-1.1196	1.99955
RHBDD3:S325s	-1.119	0.610297
ARHGEF38:S317s	-1.11865	0.0594635
GCOM1:S469s	-1.1185	3.21033
TJP3:S600s	-1.11755	0.947466
WIPI2:S390s	-1.1169	2.01579
NA	-1.1164	0.721619
APOA1:K47k	-1.116	0.895093
INO80:S1512s	-1.1158	1.71577
SRCIN1:S434s	-1.1156	1.47534
IVL:S12s	-1.1147	0.630216
EXPH5:S1709s	-1.11425	0.175404
TTC3:S1049s	-1.11425	4.17243
ATL3:S535s	-1.1141	2.68215
CAPS:S160s	-1.1126	1.07626
CARMIL1:S880s	-1.1126	1.96004
BMP2K:S979s	-1.1122	1.14058
TCEAL3:S86s	-1.1119	1.00269
ADCY9:S691s	-1.1118	3.75849
ATL1:S22s S23s	-1.1113	2.81247
ADCY9:S688s S691s	-1.1112	3.43253
CFTR:S795s	-1.1107	1.49984
NECTIN4:S426s	-1.1106	0.929298
TLE3:S201s S203s	-1.1103	4.30075
NA	-1.1099	0.518937
RANBP2:T1393t S1400s	-1.1093	1.56749
MAST4:S166s	-1.1088	2.1764
PCDH15:K1662k K1677k	-1.10855	0.999718
ZNF391:S47s	-1.10855	1.59464
ARHGAP29:S930s	-1.1085	2.28918
PPP2R3A:S505s	-1.1085	3.84348
EPB41L1:S69s S75s	-1.10835	1.92763
SMARCA4:T1455t	-1.1081	2.04528
NA	-1.1076	2.94515
ATL1:S23s	-1.10755	2.67664
PLEKHA6:S842s	-1.1075	2.28918
KRT80:S51s	-1.1074	1.27107
STMN1:S63s	-1.1072	2.28042
RFX5:T168t	-1.1069	1.63019
NELFE:T91t	-1.1068	2.10034
EXPH5:S876s	-1.10635	2.38877
MEOX1:S155s	-1.1063	0.0424964
BCR:S1264s	-1.1061	1.87519
CYSLTR1:S313s	-1.1058	1.94496
NCOR2:S1262s	-1.105	1.96879
KIAA1522:S1018s	-1.1049	0.371449
ARHGAP44:S640s	-1.1049	1.4669
UBTF:K198k K200k	-1.1045	1.46032
AXL:T509t	-1.1044	1.77444
TPD52:S176s	-1.10405	1.38429
NA	-1.1037	2.28918
ABCC3:S911s	-1.10365	1.90782
NA	-1.1033	0.733986
NA	-1.1027	1.76202
NA	-1.1025	2.7012
ANGPT2:S58s	-1.1022	1.35553
KRT19:S72s	-1.10215	0.00148572
HTATSF1:S241s	-1.10205	3.61608
PPP1R12A:S908s	-1.1019	1.69707
NBAS:S1441s	-1.1013	2.61093
ZNF609:T746t	-1.1004	1.58506
CAMSAP3:S1042s	-1.10035	2.00277
NA	-1.1	1.98037
RANBP2:S2520s	-1.09985	1.36214
LMTK2:S878s	-1.0997	2.01476
C1orf226:S91s	-1.09965	0.893256
RBM15B:S552s	-1.0996	2.2282
UBXN2B:S216s	-1.0994	1.90364
PTPN13:T1982t	-1.0992	2.94244
EPB41L4A:S389s	-1.0983	2.95513
MICALL2:T330t	-1.09825	1.96198
MEF2C:T196t T205t	-1.09775	2.11738
ADAR:S629s	-1.0977	2.54227
PLEKHG1:S677s	-1.0976	1.44023
SRCIN1:S508s	-1.09755	1.53362
SHC1:Y318y	-1.0975	1.77579
HECW1:S68s	-1.09735	2.13867
RERG:S181s S182s	-1.097	1.79084
RRN3:S44s	-1.09685	0.964357
ZNF518A:T417t	-1.09675	0.74844
NA	-1.0967	1.06644
HSPB1:Q80q S82s	-1.0962	2.04198
MAP1S:S657s	-1.09615	2.41497
HSD17B14:T3t T5t	-1.0961	1.03279
ATP7A:S1463s	-1.0959	2.28352
FAM169A:S378s S379s	-1.09565	1.35785
KIAA1522:M1082m S1087s	-1.0956	1.2097
ACACA:S2s	-1.0956	1.54073
FAM102A:S186s S189s	-1.0952	0.499046
NA	-1.0951	1.00483
MYO9A:S755s	-1.0948	0.475633
LTBP2:S250s	-1.0947	1.52503
COBL:S574s	-1.0946	3.61954
NRIP2:S96s	-1.0937	0.857925
EPB41L1:S441s	-1.0936	4.45808
ARFGEF1:S397s S406s	-1.0932	0.88369
EIF4G3:S1110s	-1.0932	2.11773
PACS2:S268s	-1.09295	1.81018
FEZ2:S195s	-1.0929	0.930202
TRIM2:S96s	-1.0926	1.53426
OR6B3:K298k	-1.0923	2.08404
ELOA:S251s	-1.0922	1.73895
NA	-1.0922	1.21401
TMEM154:S179s S183s	-1.0915	1.9818
FGD5:S1328s	-1.0914	0.431306
COG5:S49s	-1.0914	1.57615
CCDC157:S175s	-1.09125	0.455679
PDIA4:K362k	-1.0911	0.550587
ZCCHC10:S79s	-1.09035	0.977583
BRD4:S324s	-1.09025	1.0669
OCLN:S321s	-1.09	1.70158
ATG2A:S403s	-1.0899	2.96513
PLEKHO2:S278s	-1.0894	0.07301
NCOA7:S89s	-1.0889	2.14254
WFS1:S32s	-1.0886	2.53223
NA	-1.0885	3.90174
NA	-1.0878	0.918165
PLEKHA7:S1022s	-1.08765	1.11511
SHROOM2:S208s	-1.08765	2.57522
AGFG1:Y351y	-1.08745	1.25409
MLPH:S226s	-1.08725	1.22822
MSANTD4:S101s	-1.08705	3.28124
MINK1:S601s	-1.087	2.68215
CLASP2:S241s	-1.08645	3.63999
NA	-1.0863	1.23896
PRKAG2:S71s	-1.0863	3.31545
PCYT1A:S315s	-1.086	1.12516
TNIK:S795s	-1.086	1.77957
CCDC170:S96s	-1.08595	1.38579
NA	-1.0855	2.36881
NA	-1.0853	1.82461
WDR44:S262s T271t	-1.0849	1.22913
ABCC4:S404s	-1.0843	2.74419
ARHGEF16:S129s	-1.0835	0.628826
CDK18:S117s	-1.083	2.37774
NA	-1.08295	1.55951
TNKS1BP1:S1158s	-1.0829	1.41264
CIT:K1941k	-1.0828	1.29836
UBAP2L:T241t	-1.08235	4.22007
ASNSD1:S636s	-1.0823	1.30027
KIAA1211L:S51s	-1.0823	0.657574
PUM1:S709s	-1.0814	4.32808
C6orf132:S260s	-1.08135	1.55931
WFS1:S235s	-1.0812	1.37838
SCAF11:S608s S614s	-1.0809	1.07573
UBE2H:S2s S3s	-1.0807	1.18307
ZNHIT2:S115s	-1.0801	0.787192
PLEKHA5:S357s	-1.08005	1.64236
ANK3:S1833s	-1.08	3.01466
MTUS1:S760s	-1.0799	1.92773
APPL2:T405t	-1.07975	1.49938
AP3B1:S750s S752s	-1.0794	0.784016
FAM53B:S409s	-1.0792	2.68801
NCOA1:K579k	-1.0788	1.35592
NA	-1.0787	0.523786
IKZF2:S56s	-1.0782	2.68215
CACNA1D:S869s	-1.07775	0.275749
TGFB1I1:Y60y	-1.0775	2.2282
EMD:Q119q S123s	-1.0774	1.01256
ACSL5:S28s	-1.0774	2.06071
CALU:S52s	-1.0771	1.21962
KIAA1217:S1259s	-1.0766	1.00959
RBMX:S332s	-1.07655	2.25784
CLIC6:S239s	-1.0765	0.941404
MIA2:T1009t	-1.0761	2.64872
ITPRID2:S354s	-1.0756	1.72432
NA	-1.0754	1.05219
UBAP2:S254s	-1.07525	1.21649
WASHC2C:S663s	-1.0749	1.34816
CHD4:S103s S105s S108s	-1.0749	2.26222
CFTR:S712s	-1.0748	0.547958
HP1BP3:K478k	-1.07445	0.409259
SYTL2:S512s	-1.0742	2.12561
ANK3:S489s	-1.07415	1.89389
KNL1:S1831s	-1.0741	1.03127
SPINT2:S238s	-1.0741	1.0324
ZC3H12A:S375s	-1.0735	0.907037
NA	-1.0733	4.32808
KIDINS220:S1360s S1362s	-1.07255	1.85473
CARMIL1:S1068s	-1.0724	2.83248
MLH3:S746s	-1.0723	3.00623
GPSM2:T486t	-1.07225	2.70064
RGS3:S726s	-1.0722	2.07523
EVPL:S517s	-1.0721	1.49606
STARD3NL:S193s	-1.0715	2.94896
NA	-1.07125	0.657383
SIK3:S626s	-1.0708	4.24341
NA	-1.0704	0.706565
NA	-1.07035	2.34758
NA	-1.0703	1.56827
TRIM66:S125s	-1.0702	2.16154
BIVM-ERCC5:S1016s S1017s	-1.07	1.00829
ZFAT:S623s	-1.06955	0.636315
HTATSF1:T633t	-1.0694	1.70603
NA	-1.0693	3.15232
MRTFB:S205s	-1.0692	2.52577
HYDIN:S1958s	-1.06855	2.63505
TACC1:S153s	-1.0681	1.71243
GOLGB1:S2221s	-1.0675	1.12982
TOPBP1:S1504s	-1.0674	0.44006
AKAP6:S1655s	-1.067	2.46144
TAB3:S645s	-1.067	2.83868
NA	-1.0666	0.733142
RPS6KA3:S415s	-1.0666	1.24543
SLC20A2:S316s	-1.06635	1.56291
ZMYM3:S263s S267s	-1.0659	4.75172
SFMBT1:S765s S767s S775s	-1.0656	0.64784
TNKS1BP1:S893s	-1.0655	2.13406
MTFR1:S290s	-1.0649	1.86394
ZNF800:S317s	-1.06435	2.90369
NA	-1.0639	1.62714
MOSPD2:S299s	-1.06375	3.28981
NA	-1.0636	2.69166
NA	-1.0633	1.57341
MAP1B:S541s	-1.0632	0.820192
TRIO:S2662s	-1.0631	1.53312
PRKAG2:T221t	-1.0627	3.01035
APLP2:S223s	-1.06255	1.76677
NA	-1.0625	1.37158
SZT2:S2902s	-1.06245	2.79506
DAP:S3s	-1.0624	1.48239
HIVEP3:S948s	-1.0623	2.34418
SH2D4A:S51s	-1.0621	1.43896
EPB41L1:S69s	-1.0621	2.78248
HNRNPA1:S199s	-1.0619	3.47761
CAMK2G:S350s T353t	-1.0617	3.90611
IRX5:S248s	-1.0612	1.69513
SRGAP3:S948s	-1.0611	1.19302
PLEKHA7:S1063s	-1.06055	0.704992
HLCS:S271s	-1.05995	4.38784
GAB1:T668t	-1.0595	5.09114
CNBP:S123s	-1.05935	2.43609
TSC22D3:Q71q S73s	-1.0592	1.66401
AGFG1:S317s	-1.059	1.24452
SYTL2:S489s S494s	-1.0589	1.06451
BCLAF1:S414s	-1.05865	1.66685
RPL37:M64m K68k	-1.0583	1.38415
DCDC2:S300s	-1.0583	0.381333
NFIA:S271s T272t S274s	-1.0583	0.923017
ELOVL5:S300s	-1.05765	1.99866
ANKHD1-EIF4EBP3:S1679s	-1.05715	1.2549
NA	-1.0571	0.253901
NA	-1.0569	2.25423
PHACTR1:S492s	-1.0563	2.20057
WHAMM:S775s	-1.056	2.84033
IRX1:S267s	-1.05585	2.69955
DCLK1:S307s	-1.0556	3.46555
GTF2F1:S431s S433s	-1.05515	2.0241
THEM6:S199s	-1.0551	2.14355
DTNB:S601s	-1.0551	2.18769
EPS8:S502s	-1.0549	0.697085
RAB11FIP2:S277s	-1.0549	0.974594
CAMSAP1:S1232s	-1.0545	2.21956
BNIP3:S131s T137t	-1.05425	1.13864
MPHOSPH10:S163s S167s S171s	-1.05395	0.723242
CCAR2:S195s	-1.0539	2.27727
NHS:S1461s	-1.0537	1.41385
PTPN13:S301s	-1.0535	1.94928
C8orf34:S148s	-1.05345	2.89672
CAMKK1:S502s	-1.05305	2.93628
NA	-1.0525	3.48184
ARHGAP12:S103s	-1.0524	1.84029
FAM177A1:S179s	-1.05195	1.65982
KIAA1191:T36t	-1.05195	2.7564
INPP5B:S214s	-1.0519	2.88159
PDXDC1:S722s	-1.0518	2.28079
PPL:S1310s	-1.05155	1.65858
MINK1:S701s	-1.0509	2.92523
PARD3:T947t	-1.0508	0.544581
EMD:S143s	-1.0508	1.8492
EGFR:Y1092y	-1.0505	0.28043
GPHN:T319t	-1.0505	1.00445
NSFL1C:S101s	-1.05015	1.6508
ESYT2:S710s S711s	-1.0501	2.38934
WIPF2:S144s	-1.0498	2.37146
ARHGAP12:S198s	-1.04955	2.29744
ZNRF2:S28s N32n	-1.0495	1.513
NA	-1.0494	1.51789
PHF2:S882s	-1.0494	1.55379
TBC1D22B:S67s	-1.04925	1.38293
CC2D1A:S292s	-1.04905	2.60478
BRPF1:S897s	-1.0489	1.91508
CLOCK:S408s	-1.0488	0.83746
TBC1D5:S723s	-1.0482	2.45059
NA	-1.0481	0.857925
NA	-1.048	2.54147
NA	-1.0473	0.276735
PLCB2:S943s	-1.0472	1.08074
TNFRSF10C:S121s	-1.047	0.226609
IFT140:S191s	-1.047	2.72282
IQGAP1:K1458k	-1.0469	1.40831
KCTD5:S29s	-1.04675	2.34873
NA	-1.0467	2.10875
MAST4:T1386t S1391s S1397s	-1.04655	1.99734
FAM83H:S1003s	-1.0449	1.96816
EPB41L1:S60s	-1.04485	1.02739
PIGR:S708s	-1.0447	1.42646
NNT:K166k	-1.0446	1.01987
USE1:S154s	-1.0444	1.59282
EIF4EBP2:T36t T37t	-1.044	2.41365
RNF25:S450s	-1.0436	1.98444
CDK13:S1054s T1058t	-1.0433	1.72624
NA	-1.043	5.33035
SSH2:T795t	-1.0427	1.7717
HOXB-AS3:M63m T69t	-1.0425	3.27218
ZBTB21:S409s S411s	-1.04235	1.02413
TNS3:S952s S953s	-1.0421	2.37968
ZNF213:S165s	-1.04115	3.03696
DDX3X:S594s	-1.0411	1.10058
RALGAPA2:S698s	-1.0407	0.696005
ANK3:S1462s	-1.0405	5.88624
NA	-1.0403	0.933363
FZD6:S656s S666s	-1.0397	1.61951
PIGR:S673s	-1.03775	0.685907
CCPG1:S188s	-1.0373	1.34076
NA	-1.0371	2.75876
ERBIN:S915s S933s	-1.0371	0.699224
EML4:S134s	-1.0371	1.47217
PRRC2A:T1087t S1089s S1092s	-1.0369	2.05026
CTNNA1:K747k	-1.0364	1.16806
AHNAK:S5737s	-1.03605	1.09486
NA	-1.0356	0.879831
FOXO3:S253s	-1.0356	3.64128
PCM1:S1758s S1761s S1769s	-1.03555	1.58463
RALGAPA1:S932s	-1.0355	2.48409
TRAPPC10:S1209s S1212s	-1.0354	1.10048
FOXA2:S312s S313s S315s	-1.0354	3.12399
NKRF:S587s	-1.0348	3.32074
PCNX3:S505s	-1.03465	1.89232
NA	-1.03435	2.67349
CPQ:N26n S29s	-1.03435	0.834045
FUBP1:S120s	-1.0339	1.20846
OCLN:S378s	-1.03385	1.08686
LAD1:S468s	-1.03375	0.736601
SIPA1L3:S391s T402t	-1.0337	1.77037
KIDINS220:S1682s	-1.0337	2.12561
SOAT1:S16s	-1.0336	3.04914
CABLES1:T415t	-1.0336	0.92979
NA	-1.03345	1.4093
EPB41L4A:S618s	-1.0334	1.14193
NDUFAF2:S134s	-1.0332	1.84532
ITPRID2:S330s	-1.0329	1.58463
DLG5:S866s	-1.0327	2.34359
LMNB1:K330k	-1.03245	1.28087
NAV2:S1121s S1125s	-1.03225	0.829179
TEAD2:S117s	-1.03215	0.368909
USP54:S24s	-1.0321	1.93512
CCDC120:S393s	-1.0318	1.90989
MARK2:S376s	-1.0317	1.58282
MAGI3:S699s	-1.0312	1.88773
EIF4G1:S1154s	-1.03095	0.624366
MAP9:S97s	-1.03095	0.90355
ALPK1:S721s	-1.0309	0.732312
NUMA1:S2047s	-1.0307	1.95194
NA	-1.0305	2.13406
NA	-1.0303	0.65257
VEPH1:T381t	-1.03	3.06608
KMT2D:K3433k	-1.02995	3.02951
AFDN:S1195s	-1.02985	1.87299
C1orf116:S21s	-1.0296	1.43679
PDXDC1:T662t	-1.02945	2.07581
PTPN13:S958s	-1.0294	1.82627
TSC2:S1352s	-1.02895	1.83809
TXNDC17:K89k	-1.0286	1.04126
RAP1GAP:S7s	-1.0283	2.11539
FKBP5:S445s	-1.0281	1.13004
RBM17:S266s	-1.0278	1.68905
EPS8L2:S240s	-1.0277	2.03831
ELOA:S285s	-1.0276	0.116594
EPB41L3:S88s S91s	-1.0276	0.949761
SMG6:S332s	-1.0274	1.75041
CEP170B:S783s S798s	-1.02685	1.25105
NA	-1.0268	0.890882
STK39:S371s	-1.0264	1.61987
DENND4C:S1110s M1122m	-1.0264	2.30676
AKAP13:S2720s	-1.0263	3.31545
TACC2:S2076s	-1.0259	1.08839
NA	-1.0253	2.38669
PATJ:S957s	-1.0252	2.0665
SYTL3:S203s	-1.0252	2.31823
USP54:S614s	-1.0248	2.66733
CNKSR1:S300s	-1.0246	5.22083
DLC1:S544s	-1.02415	1.36572
FAM160A1:S16s	-1.0239	2.06191
KIF1B:S1599s	-1.0235	1.75812
NACA:T867t T869t	-1.02335	2.12681
DCP1A:T225t	-1.0233	3.56193
KAT6A:S420s	-1.023	1.00541
DLG3:S10s	-1.023	2.24554
TRIM2:S428s	-1.0228	1.5538
SNW1:S33s	-1.0228	3.31317
PYM1:T68t	-1.02255	1.1587
RAVER1:Y664y	-1.02255	2.04857
FGD6:S231s	-1.0215	1.44681
CDK13:T1246t	-1.0208	3.4764
COBLL1:S326s	-1.0206	2.33325
NA	-1.02055	0.948612
PDZD2:S944s S948s	-1.02055	0.739017
ITSN2:S210s	-1.02055	2.06281
MYH15:K561k	-1.0204	1.32587
ITPRID2:S641s S644s	-1.02005	1.86595
RAB11FIP1:S435s	-1.0198	2.02545
TANC2:S235s T236t	-1.01955	2.13352
L3MBTL3:S670s	-1.01925	1.28645
AKAP6:S1595s	-1.019	2.85952
EIF4G1:S1245s	-1.0186	3.14809
AKAP13:S2720s S2728s	-1.01845	2.64658
ARHGEF26:T370t	-1.01835	1.57321
SLC43A2:S297s	-1.0182	1.41954
NA	-1.01795	1.37288
NA	-1.0178	3.81009
UCK1:S11s	-1.0178	2.9027
PAXBP1:K608k K614k	-1.0175	1.75636
AGAP1:S339s	-1.017	1.5194
SAMD1:S261s	-1.017	2.28344
PITPNM3:S30s S31s	-1.01665	0.682397
STX6:S2s	-1.0164	3.89022
INTS10:S382s	-1.01635	3.28543
USP33:S377s	-1.0162	2.26074
UTRN:S825s	-1.0158	2.10362
DOP1B:S1021s	-1.0155	1.19408
FNIP2:S15s	-1.0153	2.53191
REV1:S1133s	-1.0153	2.71894
NEFM:S680s S685s	-1.0152	1.26622
NA	-1.015	0.670085
CAMSAP3:S431s	-1.0148	2.50329
COBLL1:S204s	-1.01455	3.10819
FAM241B:S28s	-1.0144	1.6948
CDK16:S184s	-1.0144	2.65908
EIF5:S419s	-1.0143	2.50951
MAGI3:M232m S234s	-1.0142	2.03613
CLDN6:S201s	-1.01335	1.70143
MDC1:S1797s	-1.0133	1.70018
NEDD4:S747s	-1.0133	2.48628
PCNX3:S287s	-1.0131	4.3926
LRRC8C:S206s S215s	-1.01305	1.44685
KDM2A:S558s	-1.0129	2.93518
MAP4:K986k	-1.01265	0.863566
RIF1:S1238s	-1.0124	2.09559
C1orf189:T22t T31t M37m	-1.01195	1.52922
KIAA1671:S1441s	-1.01175	2.01739
STAC:S279s	-1.0117	1.09231
UPF3A:S401s	-1.01095	1.40869
EPPK1:T1543t	-1.01	0.891916
JPH2:K647k K651k	-1.00985	2.49977
ARHGAP12:S176s	-1.0097	1.44731
AP3B1:T661t	-1.0093	0.29077
ASH1L:S1649s	-1.0093	1.96639
AHDC1:S1507s	-1.0091	3.66261
NA	-1.009	0.523334
ABCC3:S908s	-1.0088	2.60893
NA	-1.0087	0.306526
SIN3A:S277s	-1.0087	2.86592
GIGYF1:S137s	-1.0085	1.36479
SLC9A6:S657s	-1.0084	1.45429
LPXN:S132s M136m	-1.00835	1.00715
ARVCF:S915s	-1.0079	2.78778
UBA5:S358s	-1.0077	2.3599
SLTM:S872s	-1.0074	0.705335
NA	-1.00705	0.171262
GIGYF2:S201s	-1.0068	0.623863
LYST:S1636s	-1.0067	1.041
KANK2:S411s	-1.0066	2.32023
TBC1D4:S600s	-1.0065	2.41649
NA	-1.0057	2.63482
ZZEF1:S1464s	-1.0057	0.965294
AKR1C3:K246k	-1.00565	1.4573
NA	-1.00565	0.405675
RBBP8NL:S487s N493n	-1.0056	3.44389
NA	-1.0056	1.75488
PALM3:S260s	-1.0055	1.41954
XRCC6:S477s	-1.0052	4.45056
MAST4:S1370s	-1.0051	1.98367
METTL3:Q28q S30s	-1.00505	1.65135
CUX1:S1507s	-1.00505	1.79146
WNK1:S31s	-1.005	1.05928
MINDY4:S190s	-1.005	1.31326
EGFR:Y1172y	-1.0048	2.36765
TIAM1:S52s	-1.0047	2.62893
COBL:S1227s	-1.0044	2.66496
MAP1B:S2100s	-1.0042	0.405653
R3HDM2:S263s	-1.0042	2.19373
RBMX:S352s	-1.0038	2.86591
SAMSN1:T42t N51n	-1.00315	1.57633
RTEL1:S791s	-1.00305	1.37782
PDAP1:S170s	-1.00305	4.13365
TEX2:S399s	-1.00285	1.4262
KLRG2:S204s	-1.0028	0.832294
NA	-1.0025	2.80721
MIA2:S1156s	-1.0025	0.0315221
AKAP9:S1327s	-1.00235	2.85518
TRIP11:S1001s	-1.002	1.06644
NSD3:T109t	-1.002	1.22967
ZFYVE26:S144s	-1.00195	2.95939
NA	-1.0019	3.01539
CTNND1:S920s	-1.0015	2.56929
LIMA1:S24s	-1.0012	1.09795
KLC2:S428s	-1.0008	1.98138
AMOT:S823s	-1.00065	2.91727
NBEAL1:S2679s	-1.0003	1.70369
RBM5:S576s	-1.0003	1.87918
COBL:S668s	-1.00005	1.72608
NA	-1	2.53685
ATXN1L:S284s	-1	3.56324
RHBDD1:S314s	-0.99915	0.963569
OSBPL6:S369s	-0.999	2.02778
NCAPD3:K1088k	-0.9989	1.3156
TJP3:S173s S178s N181n	-0.9989	1.16251
NCL:K116k K124k	-0.9987	2.0869
PUM2:S587s	-0.9986	1.14999
RAP1GAP:S439s	-0.9985	2.18854
NA	-0.9984	0.770358
ZDHHC23:S206s	-0.9981	1.62686
WDR60:S30s	-0.998	2.26201
NA	-0.9978	3.17913
TFRC:S34s	-0.9974	1.7857
SHROOM3:S927s	-0.99735	0.518413
CDCA3:S94s	-0.99735	0.906932
NA	-0.9973	0.94189
LMTK2:S1107s	-0.99715	2.7889
NA	-0.997	1.6865
PLEKHA7:S867s S871s	-0.9968	2.07523
CCDC50:S276s	-0.99665	0.627057
EVPL:S906s	-0.9963	1.27211
NA	-0.9959	1.25193
KIDINS220:S1362s	-0.9959	1.04992
TPSB2:S219s	-0.9956	2.7215
CSDC2:S58s	-0.9954	0.455304
CHD4:S1308s	-0.9954	3.77601
TBC1D30:S581s	-0.99535	2.33234
PPP1R12B:S504s	-0.9952	0.0448922
FMN1:S1181s	-0.9952	1.4074
TBC1D9B:S796s	-0.9949	2.90689
KANK1:S312s	-0.9948	1.37623
WDR60:S197s	-0.99475	0.822788
CCDC88C:S1591s	-0.9946	0.612195
TPM1:K70k	-0.9945	0.915704
TBC1D15:S96s	-0.99445	2.25782
BCAS1:S552s	-0.9943	0.751566
MECOM:S624s	-0.9942	1.25192
NA	-0.9941	1.22143
MCM6:S762s	-0.9941	0.227131
SSH3:S602s	-0.994	2.28918
ARHGEF17:T398t	-0.9935	2.86591
NHS:S506s	-0.99315	2.2774
OGN:K239k	-0.993	0.660995
MMACHC:S247s	-0.99285	1.225
NA	-0.9923	2.84627
PDZD2:S2341s	-0.99215	1.95978
KLRG2:S77s	-0.99165	1.54695
PLEKHA6:S591s	-0.99145	0.636315
ZNF513:S7s	-0.9913	1.88919
PRDM11:S29s	-0.9906	1.93383
MYO9B:S1043s	-0.9906	2.40057
PHF12:S691s	-0.9904	2.70167
GPRIN1:S704s	-0.99035	1.64315
SASH1:S170s	-0.9903	2.1989
DEPDC5:S1090s	-0.99025	1.99398
CAST:S67s	-0.9902	2.5046
RTN3:S16s S17s	-0.9894	1.19259
CCDC88A:S1417s	-0.9894	2.24989
DCLK1:S51s S55s	-0.98895	0.865954
NA	-0.9888	2.62971
KMT2C:S1248s S1250s S1251s	-0.98845	1.85228
JMY:S902s	-0.9881	1.47461
PMS2:S535s	-0.988	0.698181
SH3RF1:S108s	-0.988	1.65753
LAMA5:K2276k	-0.9879	0.634797
EPB41L1:S544s	-0.9879	1.59012
ANLN:S658s S661s	-0.98785	0.408326
TIAM1:S358s	-0.9878	2.1195
PTPN13:S911s	-0.9877	1.71419
LMO7:S550s	-0.9876	0.640689
SYTL3:S243s	-0.9874	2.87575
PALLD:S17s	-0.9873	1.57688
LSP1:S218s	-0.9868	1.43339
SHE:S246s	-0.98675	1.89562
NA	-0.9867	1.25241
EML4:S134s S138s	-0.9867	1.26337
CAMSAP1:S431s	-0.9865	1.70507
GRIP1:S795s	-0.98645	1.46433
SYDE2:S1037s	-0.98635	1.70475
MTUS1:S808s	-0.9863	1.14973
MACC1:S191s	-0.9859	1.52414
DCLK1:S313s N315n	-0.9858	2.55072
USP28:T501t	-0.98545	2.10533
PPP1R1B:S148s	-0.985	0.359281
PAK2:T169t	-0.9848	2.79748
BOK:S8s	-0.9847	2.38669
ATF2:K105k	-0.98415	0.43094
TNKS1BP1:S1229s	-0.9837	2.72344
TRPM7:S1255s	-0.9832	3.99181
RPRD2:S798s	-0.9828	1.00483
PRKD1:S249s	-0.9818	3.10695
CALU:S52s Y55y	-0.9817	0.36395
SEC22B:S111s	-0.9817	4.01365
TTLL5:S433s	-0.9814	0.756941
NA	-0.9814	0.634306
SVIL:S914s	-0.98135	1.95333
DAAM2:S1016s	-0.98065	1.66325
AJUBA:S123s	-0.9806	1.94519
NA	-0.9805	3.76469
TBC1D10B:S687s	-0.98035	2.23312
COBL:S235s	-0.97965	2.7068
TNKS1BP1:S1678s	-0.9796	2.02269
SYTL2:S279s	-0.9795	1.40847
ARHGEF2:S125s	-0.9795	2.13411
ZNF185:S466s S470s	-0.9788	1.06321
ANK3:S22s	-0.9788	2.84847
PTPRK:S857s	-0.9787	3.30486
NA	-0.9786	0.434093
NA	-0.9786	2.19373
NA	-0.9784	2.54147
ATXN2:S812s	-0.97815	1.87149
ARHGAP27:S198s	-0.9777	0.904727
MAP1B:T1853t	-0.9774	0.847482
TEX2:S196s	-0.9773	1.61109
NA	-0.97705	0.630484
ARFGEF2:S1024s	-0.97685	2.28413
TIMMDC1:S277s	-0.9768	1.00366
SLC9A1:S726s	-0.9766	0.371406
RAPGEF1:S480s	-0.9766	1.41474
P2RX7:S390s	-0.97655	0.941029
ARHGAP31:T1382t	-0.9763	2.52216
DCLK1:S352s	-0.97615	2.36636
PPFIBP2:S389s	-0.976	3.98285
CFAP100:K94k	-0.97565	0.147147
PTPRU:S863s T867t	-0.97545	2.25707
UTRN:S1258s	-0.9753	2.29856
KIAA1211L:S951s	-0.9752	2.31923
LZTS3:S451s	-0.97515	1.51179
PLEKHA7:S903s S907s	-0.9751	0.772759
RASGRF2:S726s	-0.9751	1.38324
EGFR:S1064s	-0.975	1.39203
KIAA0556:S1596s	-0.97475	2.88803
ERBIN:S1253s	-0.97465	1.3996
SYTL2:S278s S279s	-0.9745	0.601446
WDR20:S384s	-0.9744	1.66978
FAM13A:S329s	-0.9741	0.0364772
UBXN4:T499t M508m	-0.974	0.851166
KMT2C:S2068s	-0.974	1.96933
UTRN:S1861s	-0.974	1.53003
AFF4:S212s S222s	-0.97365	0.545359
ITPRID2:S593s	-0.9736	1.51075
NA	-0.9735	3.33668
BSCL2:S333s	-0.97335	0.855693
KANSL1:S565s	-0.9733	1.85597
MAP1B:T908t	-0.9731	0.717308
PHLDB1:S563s	-0.9731	1.80024
UTY:S1310s M1321m	-0.9731	1.83709
EPB41L1:T686t	-0.9731	3.89022
CMKLR1:S358s	-0.97295	0.847287
METTL3:S50s	-0.9728	2.59727
NA	-0.9727	1.8957
MAP1B:S541s S544s	-0.97225	1.01274
RANBP2:S1972s	-0.97185	2.44164
ZSWIM8:S48s	-0.9717	0.411746
DENND5A:S851s	-0.9717	2.82671
TMEM9B:S164s	-0.97165	1.94396
TKT:K59k	-0.9713	0.992602
COG3:S516s	-0.9713	1.94385
TNKS1BP1:S429s S435s	-0.97105	2.76323
NFIX:T267t	-0.971	4.50333
SEPT9:S111s	-0.9706	1.86392
EPB41L1:S510s	-0.9704	2.61602
VGLL4:S262s	-0.97035	3.04113
CHD1L:S888s	-0.97035	1.44596
HIRIP3:S223s S227s	-0.9703	3.22076
AHNAK:S5031s	-0.97	1.13754
ARHGAP5:S1218s	-0.9699	1.29453
NCOR2:S939s	-0.9699	2.15103
MYCBP2:S2319s	-0.9698	2.2717
CAST:S216s	-0.9696	2.06689
ENSA:S83s	-0.9695	0.947063
NA	-0.9692	1.34025
METTL14:S27s	-0.96895	1.34938
NCL:K228k	-0.9689	0.823161
MIA2:S1243s	-0.9687	1.18774
SRCIN1:S987s	-0.9687	1.71545
PLCH1:T568t	-0.9687	2.43063
PRKACB:S34s	-0.9684	1.45429
NA	-0.9684	2.03371
GLIS3:S773s S778s	-0.96825	2.40633
KRT20:S13s	-0.9681	1.29122
ESYT2:S665s	-0.9679	2.55072
KIF16B:S566s	-0.9677	2.07943
NA	-0.9676	0.167471
SHROOM1:S308s	-0.9675	2.5786
TMEM163:S55s	-0.9674	0.606315
PDXDC1:T673t	-0.9674	2.7012
COG3:S533s S536s	-0.9673	1.87164
PHF3:S1642s	-0.9673	2.95513
PPP1R12A:S618s	-0.9668	2.3599
CNBP:T174t	-0.9668	2.59195
PTPN13:S1213s	-0.96665	3.08795
CLDN3:S203s	-0.96615	0.496302
GOLPH3L:S23s	-0.9661	1.2956
PPP2R5D:S573s	-0.9659	3.01539
NA	-0.9657	1.62624
MAGIX:S14s	-0.96565	1.56942
DYNC1H1:K4089k	-0.96525	1.90696
NFIC:S323s	-0.9652	3.35798
KIF21A:T566t	-0.9651	1.27236
OSBPL6:S44s	-0.9648	3.8427
KLC3:S173s	-0.96475	1.39116
ARHGAP39:T505t	-0.96475	0.837793
PRRC2A:S2036s	-0.9647	0.661265
NA	-0.964	0.729002
TP53BP1:S371s	-0.9638	0.639296
DENND4A:S1195s	-0.9634	1.63425
HOXD1:S193s	-0.96335	1.15631
MVB12A:S170s	-0.9633	1.37158
NFIX:S284s	-0.9633	2.62472
WDR24:S470s	-0.9627	1.96816
ZFYVE16:T140t	-0.96265	1.43023
PRRC1:M155m S188s	-0.96245	1.40435
NFIA:T272t S274s	-0.9623	3.18954
CLU:S133s	-0.9622	1.41109
ARHGAP35:T771t S773s	-0.96205	2.89326
TBC1D22B:T118t S119s	-0.9619	1.52181
ARHGAP35:S1070s	-0.9619	2.76842
CBX8:S332s	-0.9619	1.77031
SPAG9:S258s	-0.96185	1.68688
NUMA1:S1991s	-0.96115	3.04647
SHROOM2:S325s	-0.961	1.73
PHKA1:S1023s	-0.96085	1.19696
NDUFAF2:T81t T84t	-0.9606	1.64919
GPD1L:K51k	-0.96025	1.93648
DYNLL2:K9k	-0.9602	1.57682
NA	-0.95995	0.888604
ANKRD50:S1352s	-0.9595	2.10875
MAPT:S713s S717s	-0.95925	0.349048
SPDYE16:K271k	-0.959	0.469906
COG3:S514s S516s	-0.95875	0.839098
FRS2:S365s	-0.9587	2.63089
DTNB:S524s T527t	-0.9587	3.21033
TRIP11:S383s	-0.9584	1.21344
TSTD1:S94s	-0.95785	1.79617
NIPBL:K1519k	-0.9577	1.18645
SHROOM2:S1048s	-0.9577	1.63048
FAM13B:S760s	-0.95765	2.45778
PXN:S244s	-0.95725	0.899326
ANLN:T364t	-0.9572	0.473883
NA	-0.95695	1.37623
ARAF:S265s	-0.9567	0.782959
ARHGEF5:S77s	-0.9566	1.45405
KLF5:T323t	-0.95645	1.60222
TKT:K603k	-0.9562	3.20389
BCL9L:S1483s	-0.9562	0.643797
MDC1:T1664t	-0.95585	0.316299
POU2F1:T299t	-0.95565	1.47532
SRP54:S18s	-0.9556	2.04198
GPATCH2:S352s	-0.95525	1.40393
TMEM201:S454s	-0.95525	4.03543
CTNNAL1:T372t	-0.95505	2.28923
C8orf59:K37k	-0.955	0.830227
SLTM:S891s	-0.9547	1.37101
FXR2:S634s	-0.9547	2.16316
TACC2:S712s	-0.95465	1.61177
TNS3:S1149s	-0.95455	2.35569
USP24:M1284m S1285s	-0.9539	2.18516
NA	-0.9535	1.92773
NCOR2:S1326s	-0.95335	2.21437
NA	-0.9532	3.34732
PEAK1:S1237s	-0.9532	0.858402
TNKS1BP1:S429s	-0.9529	2.88561
NCK1:S85s	-0.9527	2.45497
CLN6:S31s	-0.9526	1.16879
SHANK2:S1099s T1105t	-0.95255	1.85531
UTRN:S1486s	-0.95255	2.23943
HSF2:S384s	-0.9524	1.75051
ASAP1:S910s	-0.9518	1.38552
NA	-0.9516	1.90368
PACS2:S171s	-0.95155	1.36051
NA	-0.9514	1.69404
PHF20L1:S584s	-0.9514	2.30479
NA	-0.9512	0.671945
TACC2:T1443t	-0.951	1.13736
NA	-0.9509	1.84029
DMD:S3623s	-0.9505	2.21601
NA	-0.9504	2.85608
CREBBP:S274s	-0.95035	1.09214
MADD:S813s	-0.94965	1.09962
PRRC2B:S416s	-0.9496	2.25423
FNIP1:S626s	-0.9494	1.01877
NA	-0.9493	1.9197
PHLDB1:T580t	-0.9493	1.27091
ARHGAP21:S881s	-0.9493	2.19373
USP54:S1358s	-0.9493	1.18638
HMGN5:T31t	-0.9492	0.5636
CGN:S294s	-0.94905	1.1723
USP24:S1141s	-0.9488	1.41609
APBA1:T305t S313s	-0.9485	2.29401
ITPR2:T1856t	-0.9481	1.62221
EPB41L1:S578s T580t	-0.9479	3.22076
GLCCI1:S223s	-0.9477	2.7299
ROCK2:K892k K900k	-0.9474	1.36251
FARP2:S389s	-0.9473	1.75619
NA	-0.9471	1.28571
ZMYM4:S1181s	-0.94705	1.91627
MINK1:S993s	-0.94695	2.22845
LEMD2:S134s S138s S139s	-0.9469	1.19589
FOXO4:S262s	-0.9467	3.18979
NBEAL1:S742s	-0.9464	2.11717
LIMA1:S230s	-0.9463	2.86026
OFD1:N582n S586s	-0.9459	0.756941
ANK3:S920s	-0.94585	3.3202
USP43:S844s	-0.94495	1.30592
PARN:S557s	-0.9449	2.0934
ABCC3:T887t T890t	-0.9447	0.265213
PTPN9:S557s	-0.94465	1.36984
SHE:S85s	-0.9443	1.7857
USP6NL:S591s	-0.9442	0.176668
NA	-0.9442	1.34453
PPIP5K2:T1218t	-0.9438	0.589591
AFF1:S627s	-0.94365	1.69085
KCNQ1:S27s	-0.9436	1.40575
VPS13D:S1067s	-0.9431	0.807297
UBR5:S327s	-0.94265	1.44623
SPN:S291s	-0.9417	1.04622
EEF2K:S462s	-0.94165	2.09358
LAMTOR1:T48t	-0.9416	1.99832
UHRF1BP1:T777t	-0.9416	2.30207
NA	-0.94145	2.09276
SMIM1:S27s	-0.9414	2.20927
NA	-0.941	2.67265
CHD9:K603k	-0.94085	1.24486
NA	-0.9408	2.92523
ARHGEF17:S940s	-0.9407	2.24983
WNK1:S2195s	-0.94055	2.9694
APRT:S30s	-0.94045	0.20675
MPZL1:S221s	-0.9404	1.39889
MLPH:S233s	-0.9403	1.08012
IRX5:S377s	-0.9402	0.446691
BOD1L1:S800s	-0.9402	0.762441
EIF4G3:T480t	-0.94015	2.02002
PHACTR4:S636s	-0.94015	2.69691
MLPH:S482s	-0.9401	2.28918
RGS18:S28s	-0.9397	0.630484
RALGAPA1:S1212s	-0.93945	3.30813
MEF2D:T256t S258s	-0.9394	1.75111
AHNAK2:S466s	-0.93925	0.985223
JDP2:S156s T159t	-0.93915	2.29304
FOXA2:S442s	-0.939	3.71957
JMJD1C:S601s	-0.93875	1.45047
AFDN:S1655s	-0.9387	3.09259
ASXL1:S430s	-0.93765	1.02691
MECOM:S526s	-0.9375	0.930042
PRRC2A:S166s	-0.9374	1.73399
GRHL2:T211t S214s	-0.9374	2.88868
TCF20:S871s	-0.9371	2.31687
LUZP1:S440s	-0.9369	1.4092
ATP11C:T447t	-0.9369	1.84816
RTN1:S352s	-0.9368	2.3599
CERS4:S342s S349s	-0.93675	1.71159
PCNP:S44s	-0.93655	3.21829
HOPX:S70s	-0.93645	1.48308
AHNAK:M5088m Y5089y	-0.9364	0.349203
PRDM16:S537s	-0.9363	0.564107
SPATA2:S273s	-0.9362	2.07093
NA	-0.93605	2.27549
GAB1:S402s	-0.936	2.66396
PHACTR1:S536s	-0.936	2.06858
MBOAT2:T474t	-0.9359	1.00776
PPP2R3C:K129k	-0.9358	3.02276
ETV3:K494k	-0.9357	1.14507
AFF1:S314s	-0.9357	1.02413
C6orf47:S90s	-0.9354	1.40516
POGZ:S746s	-0.93505	0.405321
TFCP2:S353s	-0.935	0.770651
EMD:S176s	-0.934	3.46429
ARHGEF12:S22s	-0.934	1.23194
NA	-0.9339	1.41264
MPRIP:T378t	-0.93375	1.42391
MAGI3:S991s	-0.93375	2.53516
NA	-0.9336	2.14254
SQSTM1:S328s S332s	-0.9336	1.35416
TACC2:S2618s	-0.93355	0.909953
EPB41L4A:S402s	-0.9335	2.46802
CRYBG1:S19s T20t S22s	-0.9334	0.530047
UBE2A:K66k	-0.9334	1.55254
KMT2C:S1987s	-0.933	2.27727
NA	-0.9329	2.60664
USP21:S142s	-0.9329	1.65565
TNIK:S610s	-0.9328	2.15415
SHROOM2:S413s	-0.9327	2.16051
NA	-0.9326	1.6382
ZMIZ2:T580t	-0.93245	3.12126
CANX:K337k	-0.9317	0.0111622
NA	-0.9315	1.26496
MAP7D1:S280s	-0.9314	0.997606
JDP2:T159t	-0.93125	2.96754
CD2AP:S67s	-0.9311	0.844375
ATP1A1:Y55y	-0.93105	1.50577
LARP4B:S498s	-0.9308	1.15298
AHNAK:S3362s	-0.9307	0.746614
ZC3H14:K378k	-0.93055	1.02064
KIF3A:K16k	-0.93045	1.34319
NA	-0.9302	1.31109
HNRNPLL:S35s	-0.9301	1.86392
NA	-0.93	1.84816
AFDN:S1234s	-0.93	2.8691
RTN1:T300t	-0.9298	1.25506
SHROOM3:S1173s	-0.9296	0.621523
DNAJC2:S49s	-0.92925	1.32701
NA	-0.9292	1.27361
CTF1:S7s	-0.9292	1.80505
EXPH5:S1201s	-0.9291	1.30227
UTRN:S1865s	-0.929	2.39566
PAWR:S233s	-0.9289	2.54861
EHBP1L1:S1218s	-0.9288	0.511699
MYSM1:S340s	-0.9288	3.67472
EDC4:S565s	-0.92875	2.73316
NHSL1:S1495s	-0.92865	1.76156
COL6A3:K1418k	-0.9285	0.429211
KRT7:S45s	-0.92845	2.1712
SRP72:T624t S625s	-0.9284	1.9197
NA	-0.92825	0.631019
HIST1H1E:K127k	-0.9282	0.755627
[truncated: 56,411 more rows]
